## Geminiviral $\beta$ C1 orchestrates organellar genomic instability to augment viral infection by hijacking host RecA

Ashwin Nair<sup>1,2</sup>, C.Y. Harshith<sup>1</sup>, Anushree N.<sup>1,2</sup>, and P. V. Shivaprasad<sup>1\*</sup>

<sup>1</sup>National Centre for Biological Sciences, Tata Institute of Fundamental Research, GKVK Campus, Bellary Road, Bangalore-560065, India.

<sup>2</sup>SASTRA University, Thirumalaisamudram, Thanjavur 613401, India.

### Abstract

Chloroplast is the site for transforming light energy to chemical energy. It also acts as a production unit for a variety of defense-related molecules. These defense moieties are necessary to mount a successful counter defence against pathogens including viruses. Geminiviruses disrupt chloroplast homeostasis as a basic strategy for their successful infection inducing vein-clearing, mosaics and chlorosis in infected plants. Here we show that a geminiviral pathogenicity determinant protein  $\beta$ C1 directly interferes with plastid homeostasis.  $\beta$ C1 was capable of inducing organelle-specific nuclease to degrade plastid genome as well as diverted functions of RecA1 protein, a major player in plastid genome maintenance.  $\beta$ C1 interacted with RecA1 in plants and its homolog in bacteria to reduce the ability of host cells to maintain genomic integrity under stresses. Further, reduction in the coding capacity of plastids severely affected retrograde signalling necessary for viral perception and activation of defense. Induction of chloroplast-specific nuclease by  $\beta$ C1 is similar to phosphate starvation-response in which nucleotides are recycled to augment synthesis of new, potentially viral, DNA. These results indicate the presence of a novel strategy in which a viral protein alters host defence by targeting regulators of chloroplast DNA. We predict that the mechanism identified here might have similarities in other plant-pathogen interactions.

**Keywords:** Geminivirus,  $\beta$ C1, DNA-Damage and repair, RecA, DPD1, Chloroplast.

**One line summary:**  $\beta$ C1 alters plastid genome metabolism.

## 1 **Introduction**

2 Chloroplast is an emerging hub for defense signalling during plant-pathogen  
3 interactions (de Torres Zabala et al., 2015; Padmanabhan and Dinesh-Kumar, 2010;  
4 Nomura et al., 2012; Serrano et al., 2016). In addition to being at the centre for  
5 photosynthesis and various metabolic processes, chloroplast also synthesizes  
6 various immune modulators such as salicylic acid (SA), jasmonic acid (JA), ethylene  
7 (ET), abscisic acid (ABA), various secondary metabolites, aromatic amino acids and  
8 other signalling molecules such as H<sub>2</sub>O<sub>2</sub>, ROS, and singlet oxygen species (<sup>1</sup>O<sub>2</sub>)  
9 (Wildermuth et al., 2001; León and Sánchez-Serrano, 1999; Nambara and Marion-  
10 Poll, 2005; Chan et al., 2010). The production of these immune modulators is tightly  
11 regulated to avoid dysfunctional expression leading to negative growth effects  
12 (Chandran et al., 2014).

13 Plants being sessile are continuously threatened by biotic and abiotic stresses. They  
14 have evolved an intricate signalling network for recognition of pathogens. Pathogenic  
15 markers (PAMPs, DAMPs, MAMPs, etc.) once recognised by PATHOGEN  
16 RECOGNITION RECEPTORS (PRR) on the cell surface or in the cytoplasm,  
17 activate signalling to the nucleus via MAPK pathway, and to other organelles such as  
18 chloroplast, peroxisomes and mitochondria via an unknown pathway (Choi and  
19 Klessig, 2016; Ma et al., 2016; Grant and Jones, 2009; Nomura et al., 2012). In  
20 response to pathogen-derived signal, chloroplast generates ROS, inducing  
21 retrograde signalling with the nucleus leading to a transcriptional induction,  
22 synthesising various defense-related genes and producing hormones such as SA in  
23 the plastid stroma (Chan et al., 2016; Grant and Jones, 2009). SA synthesis in turn  
24 induces the expression of defense genes responsible for pattern-triggered immunity  
25 (PTI) and effector-triggered immunity (ETI), thus limiting pathogenic spread  
26 (Seyfferth and Tsuda, 2014; Pieterse et al., 2012). Activation of PTI is also a part of  
27 the antiviral arsenal in plants (Machado et al., 2015; Kørner et al., 2013; Iriti and  
28 Varoni, 2015; Nicaise and Candresse, 2017).

29 Chloroplast consumes significant cellular resources. For accommodating the  
30 translational load, plastid genomes are present in multiple copies, and despite being  
31 relatively smaller, they account for substantial DNA content of the cell (>20% in  
32 mature leaf) (Rauwolf et al., 2010; Sakamoto and Takami, 2018). Multiple copies of  
33 the plastid genome are essential for maintaining homeostasis during various

34 metabolic processes (Bendich, 1987; Udy et al., 2012). The chloroplastic genome is  
35 maintained by poorly studied organelle-specific DNA DAMAGE AND REPAIR (DDR)  
36 machinery. Orthologs of bacterial RecA proteins like RecA1, RecA2, DRT100 and  
37 DRT102, along with repair proteins like MUTATOR S (MutS) are members of DDR  
38 family and they play an essential role in maintaining the copy number and structure  
39 of chloroplast DNA (cpDNA) (Majeran et al., 2012; Rowan et al., 2010; Odahara et  
40 al., 2017).

41 Most DNA viruses accumulate in the host nucleus and depend on their host for  
42 replication (Schmid et al., 2014). Among the viruses that infect plants, geminiviruses  
43 are the largest family of single-stranded DNA (ssDNA) viruses. Geminiviral particles  
44 are directly injected into the phloem by insect vectors surpassing the primary layer of  
45 defence in plants (Hanley-Bowdoin et al., 2013; Rizvi et al., 2015). However, recent  
46 studies indicated the activation of innate immunity upon geminiviral infection. The  
47 wounding response triggered by insect vector feeding can prime PTI and RNA-  
48 interference (Wang et al., 2021). Similarly, DAMPs and PAMPs are recognised by  
49 cell surface receptors such as RECEPTOR LIKE KINASES (RLKs) and RECEPTOR  
50 LIKE PROTEINS (RLPs) (Teixeira et al., 2019; Niehl et al., 2016; Nicaise and  
51 Candresse, 2017; Zorzatto et al., 2015). In line with the role of chloroplast in antiviral  
52 defense, various viral effectors disrupt the key process of chloroplast metabolism to  
53 sabotage PTI activation (Fondong et al., 2007; Gnanasekaran et al., 2019;  
54 Bhattacharyya et al., 2015; Nair et al., 2020; Medina-Puche et al., 2020).

55 Geminiviruses employ robust mechanism for replication, involving both rolling-circle  
56 replication (RCR) and recombination-dependent replication (RDR) strategies. RCR is  
57 a robust process but also leads to the production of heterogeneous ssDNA of  
58 varying lengths due to polymerase runoff or improper termination (Heyraud et al.,  
59 1993; Heyraud-Nitschke et al., 1995; Stanley, 1995). Evidence suggests the role of  
60 DNA repair machinery in the repair and reconstruction of intermediate replicative  
61 forms (RFs) (Jeske et al., 2001; Ascencio-Ibáñez et al., 2008; Preiss and Jeske,  
62 2003). RecA and Rad proteins are the mediators of homologous recombination and  
63 act as core proteins of DDR and SOS-repair pathways in organisms (Maslowska et  
64 al., 2019; Chappell et al., 2016). There are also a few studies of geminiviral proteins  
65 influencing host DDR machinery. Geminiviral Rep interacts specifically with Rad54,  
66 an important player in homologous recombination (Kaliappan et al., 2012).  
67 Choudhury et al. (2013) observed induction of Rad51 transcription in MYMV-infected

68 plants, suggesting possible exploitation of DNA repair genes by the virus (Suyal et  
69 al., 2013). Rad51D appeared to act as an important player in maintaining the  
70 genomic integrity of early viral replication intermediates (Richter et al., 2016).  
71 Surprisingly, *Radish leaf curl virus* (RaLCV)  $\beta$ C1 protein has an ATPase activity but  
72 the relevance of this activity in connection to DDR or cell-cycle pathways is unknown  
73 (Clerot and Bernardi, 2006; Gnanasekaran et al., 2021).  
74 The expression of chloroplast-localized  $\beta$ C1, a geminiviral pathogenicity determinant,  
75 is toxic to plants (Cui et al., 2004; Yang et al., 2008). We and others had previously  
76 reported a multitude of growth defects observed in host plants upon ectopic  
77 expression of  $\beta$ C1 (Nair et al., 2020; Bhattacharyya et al., 2015; Cheng et al., 2011;  
78 Briddon et al., 2003). Here we show that *Synedrella yellow vein clearing virus*  
79 (SyYVCV)  $\beta$ C1 (Das et al., 2018) induces selective degradation of cpDNA during  
80 viral infection.  $\beta$ C1 achieved this by inducing expression of DPD1 nuclease.  $\beta$ C1  
81 was also able to interact and modulate the function of RecA1, a chloroplastic DDR  
82 protein in plants and its ortholog RecA in bacteria. Interaction of  $\beta$ C1 with RecA1  
83 was paramount for successful viral pathogenesis, in increasing the viral titre and for  
84 the formation of symptoms. Disruption of chloroplastic homeostasis by degradation  
85 of cpDNA interrupted PTI signalling, further curtailing SA synthesis and SYSTEMIC  
86 ACQUIRED RESISTANCE (SAR). We show that  $\beta$ C1 can induce genotoxic stress in  
87 plants and alter the expression of various important DDR pathway genes. Our results  
88 indicate that interaction of  $\beta$ C1 protein with a DDR protein RecA1 and its influence  
89 on genotoxicity is another novel aspect of the much-appreciated arms race between  
90 viruses and their host plants.

91

## 92 **Results**

### 93 **$\beta$ C1 alters the expression of key regulatory genes in host plants**

94 The  $\beta$ C1-expressing transgenic tobacco plants were sterile, stunted, chlorotic, and  
95 presented an early flowering phenotype with exerted stigma (Figure 1A and 1B). As  
96 observed previously, the toxicity of the  $\beta$ C1 protein was dampened upon C-terminal  
97 tagging (Figure S1A). To understand the cellular pathways affected by  $\beta$ C1, we  
98 performed a transcriptome analysis using the Illumina Hi-Seq platform. We obtained  
99 an average of 20 million (M) x 2 paired-end reads, out of which 92% matched to *N.*  
100 *tabacum* genome. Upon further characterization of 3576 genes showing maximum

101 differential expression, 1963 genes were found up-regulated and 1613 genes were  
102 down-regulated (Figure S1B and S1C). Various defense response regulators were  
103 found misexpressed as expected for a pathogenicity determinant protein like  $\beta$ C1.  
104 Innate immune regulators such as secondary metabolite (suberin, lipids, and  
105 phenylpropanoid) pathway genes were down-regulated in  $\beta$ C1 transgenic plants  
106 (Figure S1D). We hypothesized that most of the phenotypes observed in  $\beta$ C1  
107 transgenic plants might be due to disrupted signalling pathways, prominently  
108 hormone and circadian rhythm pathways responsible for maintenance of  
109 development and vegetative to flowering transition, respectively. In agreement with  
110 this, transcripts of GIGANTEA (GI-like) and CONSTANS (CO5-like) key regulators of  
111 circadian rhythm were 7 and 3.5-fold upregulated, respectively, in  $\beta$ C1 transgenic  
112 plants. Chlorophyll A/B binding proteins which are under the control of TIMING OF  
113 CHL A/B EXPRESSION1 (TOC1) were 9.5-fold upregulated. A regulator of flowering  
114 LATE ELONGATED HYPOCOTYL (LHY) homolog was 6-fold down-regulated, while  
115 its counterpart EARLY FLOWERING 4 (ELF4) was 8-fold up-regulated. As observed  
116 previously (Zhao et al., 2021), PHYTOCHROME-INTERACTING FACTOR4 (PIF4),  
117 a secondary metabolism regulator was 5.4-fold upregulated. In addition, multiple  
118 auxin-responsive proteins including YUCA11 were down-regulated in these plants,  
119 while cytokinin degrading enzyme CYTOKININ DEHYDROGENASE 7-LIKE was 4-  
120 fold up-regulated (Figure S1E) suggesting deregulation of hormonal signalling in  
121 these plants.

122 Surprisingly, we also observed differential expression of a set of DDR genes  
123 involved in genome maintenance and repair in  $\beta$ C1-expressing transgenic plants  
124 (Figure S2A). Although previous research suggested deregulation of DDR genes  
125 during geminiviral replication (Ascencio-Ibáñez et al., 2008), it was not known which  
126 viral protein was involved.  $\beta$ C1 plants showed up-regulation of various DDR genes  
127 such as Rad50-like, photolyases, DRT proteins, BRCA1-like, J-Domain proteins,  
128 several nucleases and helicases (Figure S2A). Majority of the DDR genes that were  
129 upregulated in  $\beta$ C1 plants were necessary for the maintenance of the chloroplast  
130 genome (Day and Madesis, 2007). Proteins such as DRT102, DRT100, DPD1  
131 nuclease, ARC6, and FtsZ proteins regulate the copy number, replication, and  
132 damage repair of the plastid genome (Figure S2A). We also observed deregulation  
133 of many chloroplast localized genes in  $\beta$ C1 transgenic plants (Figure S2B and C),  
134 correlating with the symptoms observed in these plants. Similar deregulation of



135 plastid genes was observed in chloroplast-localized RALCV  $\beta$ C1 (Bhattacharyya et  
136 al., 2015), where chloroplastic ultrastructure was compromised leading to the loss of  
137 photosynthetic output.

### 138 **$\beta$ C1 induces chlorosis by destabilising the plastid genome**

139 Based on phenotype as well as changes in host DDR genes, we hypothesised that  
140 the cause for the deregulation of such a huge number of chloroplast genes is likely  
141 due to selective plastid DNA destabilization by  $\beta$ C1. Chloroplast localized SyYVCV  
142  $\beta$ C1 was previously identified as the causal protein for the symptoms during viral  
143 infection (Nair et al., 2020). To further confirm that  $\beta$ C1 is the protein responsible to  
144 induce chlorosis during viral infection, we infected *N. tabacum* leaves with SyYVCV  
145 DNA-A alone or with DNA- $\beta$  and DNA- $\beta$  with point mutations in  $\beta$ C1 ORF (DNA-  
146  $\beta$ m $\beta$ C1 (mSIM2,3,4;,(Nair et al., 2020)). The point mutations in the SIM region of  
147  $\beta$ C1 completely abolishes  $\beta$ C1 functions. Strong chlorosis was observed in the  
148 segment of leaves infected with DNA-A+ $\beta$  when compared to DNA-A alone. Further,  
149 very mild chlorosis similar to DNA-A was observed in the segment infected with  
150 DNA-A+ $\beta$ m $\beta$ C1 (Figure 1C). To check if the stability of the plastid genome was  
151 compromised in these leaves, we analysed abundance and integrity of plastid  
152 genome by amplifying a 3-kb segment (psbM and rpoB) from the plastid genome. A  
153 drastic reduction in plastid DNA was observed in the presence of DNA-A+ $\beta$  as  
154 compared to control nuclear DNA fragment (Figure 1D). Further, we analyzed the  
155 abundance of plastid DNA in  $\beta$ C1 transgenic plants *via* Southern blotting (SB)  
156 analysis. A clear reduction in the plastid DNA in  $\beta$ C1 transgenic plants as compared  
157 to vector control or functionally inactive  $\beta$ C1-DM ( $\beta$ C1, C-terminal tagged) plants was  
158 observed (Figure 1E). The instability and degradation of cpDNA caused by  $\beta$ C1 was  
159 more evident in later stages of infection. These observations were further validated  
160 with other plastid genes using qPCR (Figure 1F and G). *PP2A* and *ACTIN* gene  
161 taken as a proxy for nuclear genome was relatively stable in different samples as  
162 compared to the chloroplastic markers (*YCF3*, *YCF1*, *PSBj* and *RPOb*). Previous  
163 studies had highlighted a conditional role for plastid nuclease *DPD1* in degrading  
164 plastid genome (Sakamoto and Takami, 2018). *DPD1* was 4-fold upregulated in  $\beta$ C1  
165 transgenic plants (Figure S2A). We analysed the expression of *DPD1* during viral  
166 infection and observed a significant induction in the presence of DNA- $\beta$ , but not in  
167 DNA- $\beta$ m $\beta$ C1 (Figure 1H). We explored if the cause for  $\beta$ C1-induced chlorosis and  
168 necrosis during infection is linked to *DPD1*. Chlorotic and necrotic mosaic patches

169 were observed upon over-expression of *DPD1* (*PVX-NtDPD1*) in *N. tabacum* and *N.*  
170 *benthamiana* plants (Figure 1I and Figure S2D and E). To further explore the role of  
171 *NtDPD1* in  $\beta$ C1 induced chlorosis during viral infection, *DPD1* or antisense-*DPD1*  
172 were expressed along with DNA-A, DNA-A+ $\beta$  or DNA- $\beta$ m $\beta$ C1 in *N. tabacum* leaves  
173 (Figure 1J). As expected, WT  $\beta$ C1 alone induced chlorosis and limited necrosis in  
174 vector control leaves (Figure 1J, left panel). The necrosis was significantly enhanced  
175 in *DPD1* over-expressing leaves if infiltrated along with DNA- $\beta$  (Figure 1J, middle  
176 panel). Necrosis or chlorosis was not observed in DNA- $\beta$  or DNA- $\beta$ m $\beta$ C1 in  
177 antisense-*DPD1* expressing leaves (Figure 1J, right panel). These results suggested  
178 that plastid DNA was selectively destabilised by  $\beta$ C1-induced *DPD1* during viral  
179 infection.

### 180 **$\beta$ C1 induces genotoxicity in bacteria**

181 To gain further insight into the plastid DNA destabilization by  $\beta$ C1, we devised a  
182 bacterial cell-based genotoxicity assay. Since geminiviruses have bacterial origin  
183 and chloroplast is also derived from bacteria (Krupovic et al., 2009), we  
184 hypothesized that the expression of  $\beta$ C1 might be deleterious in bacteria via similar  
185 mechanism observed in chloroplast.  $\beta$ C1 and its N and C-terminal truncation  
186 mutants were induced in Rosetta-Gammi (DE3) cells followed by a treatment of a  
187 sub-lethal dose of UV-C or bleomycin to induce DNA damage (Figure 2A). The UV-C  
188 dose had minimal to no effect on the viability of cells with active DDR machinery,  
189 such as in DE3 protein expressing cells. The MBP control protein expressing cells  
190 showed appropriate growth before and after induction following stress, suggesting  
191 the external sub-lethal DNA damage was sustained and repaired in these cells. As  
192 expected,  $\beta$ C1 expressing cells showed acute lethality, suggesting that  $\beta$ C1 is  
193 genotoxic to bacteria, similar to plants. Induction of  $\beta$ C1 minimally reduced the  
194 viability of cells as seen in the drop assay, while the addition of a sub-lethal dose of  
195 UV tipped the balance between DNA damage and repair, towards damage and cell  
196 lethality. Interestingly,  $\beta$ C1  $\delta$ C59 expressing cells did not show lethality upon  
197 induction in UV or bleomycin, whereas  $\beta$ C1  $\delta$ N59 expressing cells showed cell death  
198 similar to full-length  $\beta$ C1. These results suggest that the plastid DNA genotoxicity  
199 inducing mechanism of  $\beta$ C1 is also conserved in bacteria, but in bacteria the  $\beta$ C1  
200 induced genotoxicity is conditional suggesting a role of DDR repair machinery.

201 To understand the biochemical mechanism behind the genotoxicity of  $\beta$ C1, we  
202 recombinantly expressed and purified  $\beta$ C1 from *E. coli* using size-exclusion and ion-  
203 exchange chromatography. As  $\beta$ C1 from other viruses have been shown to bind to  
204 different nucleic acids, and chloroplastic DNA was targeted by  $\beta$ C1 in SyYVCV  
205 infected plants, we explored if SyYVCV  $\beta$ C1 can bind ssDNA and/or double-stranded  
206 (ds) DNA and RNA substrates and if it can alter stability of nucleic acids. The  
207 SyYVCV  $\beta$ C1 was able to bind both ssDNA (Figure 2B) and dsDNA (Figure S3A),  
208 but displayed significantly higher binding to ssDNA (Figure 2B). The strength of  
209 binding to dsDNA was directly proportional to its length (Figure S3A). However,  $\beta$ C1  
210 did not exhibit significant binding to either ss or dsRNA substrates (Figure S3B to E).  
211 We observed significant degradation of ssDNA *in vitro* in the presence of  $\beta$ C1 in  
212 multiple biological replicates. The control MBP protein showed neither binding nor  
213 nuclease activity *in vitro* (Figure 2C). Since nucleases mostly require divalent cations  
214 as a cofactor, we checked metal ion dependency for the associated nuclease activity  
215 of  $\beta$ C1 and observed optimum degradation of ssDNA in presence of  $Mg^{2+}$  ions and  
216 to a lesser extent with  $Mn^{2+}$  (Figure S3F). We next validated these results using a  
217 metal ion chelator EDTA that removes  $Mg^{2+}$  from the catalytic interface and did not  
218 observe any nuclease activity (Figure 2D and S3G). Interestingly, the ability of  $\beta$ C1  
219 to bind ssDNA was not compromised in the presence of EDTA, suggesting an  $Mg^{2+}$   
220 independent binding (Figure 2D). Incubation of purified  $\beta$ C1 with circular ssDNA led  
221 to its complete degradation, suggesting that the *in vitro* nuclease activity associated  
222 with  $\beta$ C1 has both endonuclease as well as exonuclease activity (Figure 2E). Similar  
223 results were observed upon incubation of  $\beta$ C1 with plasmid DNA (Figure S3H).  
224 Interestingly, plant DPD1 is also an endonuclease and exonuclease degrading both  
225 ss and dsDNA. Even though, studies suggest DPD1 is not of endosymbiotic origin, it  
226 is likely that  $\beta$ C1 might be regulating other structurally conserved exonuclease family  
227 members in bacteria (Takami et al., 2018; Sakamoto and Takami, 2018). Combining  
228 all these observations we conclude that *in vitro* purified  $\beta$ C1 has a novel associated  
229 nuclease activity that might be involved in cellular genotoxicity.

### 230 **Specific domains of $\beta$ C1 mediate genotoxicity, multimerization and DNA** 231 **binding properties**

232 To delineate the motif associated with nuclease activity, we made multiple point  
233 mutations (mutant 1 to 10) in  $\beta$ C1 (Figure S3I). These point mutations were made



234 based on their conservation across different  $\beta$ C1 sequences derived from different  
235 viruses. All mutants were recombinantly purified similar to WT  $\beta$ C1 (Figure S3J), and  
236 their DNA binding ability was analysed along with WT  $\beta$ C1 as a positive control. MBP  
237 acted as a negative control. While controls behaved as expected, mutants 6 and 8  
238 showed significant reduction in binding to ssDNA (Figure S3K). None of these point  
239 mutations completely abolished the observed nuclease activity. However, we  
240 observed a reduction in the nuclease activity of mutant 6, 7 and 8 (Figure S3L).

241 To further delineate the genotoxicity domain of  $\beta$ C1, we used cell-based UV-  
242 genotoxicity assay.  $\beta$ C1 and its point mutants were induced in Rosetta-Gammi (DE3)  
243 cells followed by a treatment of a sub-lethal dose of UV-C (Figure 2F). We used  
244 MBP, and SyYVCV AC2, another nucleic acid-binding protein of SyYVCV that lacks  
245 associated nuclease activity, as controls. As previously observed, MBP and AC2  
246 expressing cells showed appropriate growth before and after induction following  
247 stress, suggesting the role of proactive DDR machinery. As expected,  $\beta$ C1  
248 expressing cells showed acute lethality after sub-lethal UV stress. A few  $\beta$ C1  
249 mutants (mutants 10 and 1) showed enhanced lethality during induction as well as  
250 with UV-stress when compared to WT  $\beta$ C1. Fascinatingly, mutants 7, 8 and 6  
251 showed a significant decrease in cell lethality (Figure 2F). These results suggested  
252 that  $\beta$ C1-associated nuclease activity was capable of causing genotoxicity in cells  
253 and its C-terminus domain is involved in this activity.

254  $\beta$ C1 exists as multimers *in vivo* as well as in purified fractions (Cheng et al., 2011).  
255 Multimerization might influence the DNA binding of proteins. We recombinantly  
256 expressed and purified  $\beta$ C1 from *E. coli* and observed higher-order multimers as well  
257 as monomers (Figure 3A). To delineate the multimerization motif, we made various  
258 truncation mutants of  $\beta$ C1. WT  $\beta$ C1 protein eluted peak was at 43 ml, suggesting  
259 that  $\beta$ C1 protein (MBP- $\beta$ C1, ~59 kDa) formed multimers in solution (Figure 3A). All  
260 the truncation mutants of  $\beta$ C1 except  $\delta$ N59 were able to form multimers. Careful  
261 examination of the truncation mutants, fine mapped the minimum multimerization  
262 motif between residues 51 to 59 (Figure 3B and S4A to L). The  $\delta$ C59 showed  
263 multimerization similar to WT  $\beta$ C1, whereas in  $\delta$ N59, the multimerization activity was  
264 completely abolished (Figure 3C). Interestingly, the DNA binding ability of the  $\delta$ N59  
265 mutant was significantly reduced when compared to other mutants matching the  
266 requirements for multimerization (Figure 3D and E), suggesting that multimerization  
267 and DNA binding activities are linked together. Interestingly, the C-terminus is

268 essential for observed genotoxicity in bacteria (Figure 2A), but the DNA binding motif  
269 is mostly localised in the N-terminus (Figure 3D). These results suggests that  $\beta$ C1 C-  
270 terminus can indirectly induce genotoxicity, likely by inducing nuclease.

### 271 **$\beta$ C1 expressing bacterial cells require RecA for survival**

272 *In vitro* DNA binding assays, purified  $\beta$ C1 had associated nuclease activity but in  
273 bacterial cells genotoxicity was conditional. Bacteria deals with DNA damaging  
274 stress employing an evolutionary conserved family of proteins such as RecA  
275 recombination protein. RecA family of proteins maintain the integrity of bacterial  
276 genome and its homologs are also conserved in chloroplast genome (Maslowska et  
277 al., 2019; Rowan et al., 2010). In bacterial cells, RecA protein acts as the central  
278 regulator of DDR machinery. We hypothesized a direct role of RecA in DNA damage  
279 response induced by  $\beta$ C1, since this group of genes were more responsive in  
280 transcriptome analysis. We used BLR (DE3) cells that lack a functional RecA protein  
281 in genotoxic assay. MBP control or empty vector did not show any difference in  
282 growth among treatments, however, as expected,  $\beta$ C1 expressing cells did not  
283 survive the induction in BLR (DE3) (Figure S5A and B). We tested the effect of  $\beta$ C1  
284 mutants in BLR cells and observed that mutant 7, 8 and m $\beta$ C1 rescued cells from  
285 lethality, reinforcing results observed in UV assay, and highlighting role of C-terminal  
286 in genotoxicity (Figure S5C and Figure 2F). To verify RecA as a key player, we  
287 complemented *Caulobacter vibrioides* RecA (*CvRecA*) in  $\beta$ C1 expressing BLR (DE3)  
288 cells. The *CvRecA* protein is a close homolog of *E. coli* RecA (*EcRecA*), and this  
289 complementation completely abrogated  $\beta$ C1-induced genotoxicity (Figure S5D).  
290 These results suggest that RecA is required by bacterial cells to subdue  $\beta$ C1-  
291 induced genotoxicity.

292 We used truncation mutants of  $\beta$ C1 to delineate the minimum motif required for  
293 genotoxic effects in bacteria by employing both UV-stress and BLR (DE3) based  
294 assays. MBP was used as control. As expected, MBP, did not show any lethality in  
295 the UV and BLR assays, whereas  $\beta$ C1 expressing cells presented acute lethality.  
296 Interestingly, truncating even as minimum as 8 residues ( $\delta$ C8) from the C-terminus  
297 significantly altered the genotoxic activity of  $\beta$ C1 (Figure 4A). Careful examination of  
298 the results showed a complete loss of lethality upon truncating 42 residues ( $\delta$ C42)  
299 from the C-terminal. Surprisingly, we observed an increase in genotoxicity in N-  
300 terminal truncation mutants of  $\beta$ C1.  $\delta$ N20 and  $\delta$ N21-41 showed increased  
301 genotoxicity as compared to WT  $\beta$ C1 (Figure 4A to C). Similar results were also

302 observed in point mutants of  $\beta$ C1 (Mutant 10) that has substitutions in the N-terminal  
303 20 residues (Figure 2F). These results suggested that the C-terminal of  $\beta$ C1 induces  
304 genotoxicity in cells while its N-terminus might be essential for regulating this activity.

### 305 **Bacterial RecA physically interacts with geminiviral $\beta$ C1**

306 DNA repair response or SOS repair in bacteria is a multi-component system, and  
307 RecA protein acts as a central player (Maslowska et al., 2019). It was previously  
308 observed that virulence proteins such as the pathogenicity determinants (for  
309 example Rep protein) interacted with Rad proteins. Geminiviral Rep protein interacts  
310 with *S. cerevisiae* Rad54 (Kaliappan et al., 2012).  $\beta$ C1 BLR (DE3) genotoxicity assay  
311 further hinted to a direct role of RecA in modulating activity of  $\beta$ C1. We explored if  
312  $\beta$ C1 is capable of interacting with RecA. Using RecA specific antibody, we were able  
313 to detect RecA in purified  $\beta$ C1 fractions. A 37-kDa band was detected in the purified  
314  $\beta$ C1 protein fraction but not in the MBP fraction. Interestingly, RecA was detected in  
315 the C-terminus truncation mutant ( $\delta$ C59) of  $\beta$ C1 but not in the N-terminus truncation  
316 mutant (Figure 5A).

317 To further verify the interaction of  $\beta$ C1 and RecA, we performed an *in vitro* pull-down  
318 assay (Figure S6A). The 6X-HIS-CvRecA was transformed in BLR (DE3) cells and  
319 the lysate was passed through immobilized MBP or  $\beta$ C1 columns following elution  
320 and WB with anti-HIS.  $\beta$ C1, but not MBP, bound CvRecA, suggesting that  $\beta$ C1 can  
321 selectively bind to RecA. Further, since RecA and  $\beta$ C1 both are ssDNA binding  
322 proteins, we analysed whether RecA is co-purifying with  $\beta$ C1 as a result of its  
323 tendency to bind to ssDNA. DNase I treated  $\beta$ C1 samples were also able to pull-  
324 down RecA, suggesting that the interaction of  $\beta$ C1 with RecA was not via DNA  
325 binding (Figure S6A). We further confirmed the interaction of  $\beta$ C1 with RecA by  
326 Affinity Purification Mass Spectrometry (AF-MS) (Table S1). RecA along with its  
327 other DDR counterparts such as RecBCD, dnaJ and dnaK were identified with high  
328 scores in AF-MS. Interestingly, nucleases like exonuclease-7 and SbcCD nuclease  
329 were also detected, reinforcing our previous observation of associated nuclease  
330 activity. These results suggest that RecA can physically interact with  $\beta$ C1 and is co-  
331 purified with  $\beta$ C1 during its recombinant expression in *E. coli*.

### 332 **RecA1, a plant homolog of bacterial RecA, can interact with $\beta$ C1 *in planta***

333 It is not surprising that a bacterial protein such as RecA was able to interact with  
334  $\beta$ C1, a geminiviral protein, since these viruses share similarities with bacterial  
335 systems and share evolutionary history (Koonin and Ilyina, 1992; Rekab et al., 1999;

336 Krupovic et al., 2009; Kazlauskas et al., 2019). RecA has close homologs across all  
337 walks of life, we wondered if such an interaction is possible in host plants with  
338 functional consequences. RecA1 and RecA3 are the closest plant homologs of  
339 bacterial RecA. RecA1 is chloroplastic with a sequence similarity of 64%,  
340 whereas RecA3 is mitochondrial and 66% similar to *EcRecA* (Cerutti et al., 1992;  
341 Khazi et al., 2003; Rowan et al., 2010). It is important to note that although Rad51  
342 type of proteins are considered as the functional homologs of bacterial RecA in  
343 eukaryotes, sequence-wise they are different from RecA (Figure S6B). Both RecA1  
344 and RecA3 consist of a core ATPase domain with conserved Walker A and B motifs  
345 similar to RecA. Interestingly, plant homologs RecA1 and RecA3 are slightly larger  
346 than bacterial RecA with a distinct N-terminal region of ~50 residues.  
347 Surprisingly, *NtRecA1* is larger and has only 77% sequence identity to *AtRecA1*  
348 (Figure 5B). We used a yeast two-hybrid system to identify if  $\beta$ C1 interacts with plant  
349 RecA homologs (Figure 5C and S6C). As expected, RecA exhibited strong  
350 interaction with  $\beta$ C1 in quadruple KO media. Previous study showed Rad51D  
351 interaction with Rep (C1) protein, hence we used Rad51D to check its interaction  
352 with  $\beta$ C1. Among the plant homologs *NtRecA1* exhibited strong interaction with  $\beta$ C1  
353 while other homologs were unable to interact. To validate the Y2H results and to  
354 verify RecA1 interaction with  $\beta$ C1 *in planta*, we employed *in planta* pull-down assay  
355 (Figure 5D). Both *NtRecA1* and *NtRecA3* were tagged with HA and co-expressed  
356 with GFP- $\beta$ C1. We detected interaction for *NtRecA1* in the pull-down assay but not  
357 *NtRecA3*, suggesting that  $\beta$ C1 interacts specifically with *NtRecA1* (Figure 5D). Since  
358 complementing *CvRecA* in BLR (DE3) expressing  $\beta$ C1 cells significantly reduced cell  
359 lethality, we tested whether the plant homolog of *EcRecA*, *NtRecA1*, which interacts  
360 with  $\beta$ C1 *in planta*, can complement BLR (DE3):: $\beta$ C1 cells (Figure 5E). BLR  
361 (DE3):: $\beta$ C1 cells, as expected, were not viable, but upon complementation with plant  
362 RecA1 showed a significant increase in cell viability. In agreement with pull-down  
363 assays, *NtRecA3* was able to complement  $\beta$ C1 only weakly (Figure 5E). All proteins  
364 expressed appropriately in the complemented system (Figure 5F). Together, these  
365 results suggested that  $\beta$ C1 can interact with RecA homologs in plants and such an  
366 interaction has conserved function since plant RecA1 was sufficient to alleviate  $\beta$ C1  
367 induced genotoxicity in bacteria.

368 **DNA binding property of plant RecA1 is modulated by  $\beta$ C1**



369 RecA1 is essential for maintaining the genetic stability of cpDNA. Binding of  $\beta$ C1 to  
370 *Nt*RecA1 might alter the activity of RecA1. To explore this further, we tested  
371 whether *Nt*RecA1 is capable of binding to DNA (Figure 6). *Nt*RecA1 was able to  
372 specifically bind to both ss and dsDNA probes (Figure 6A and B and S7A).  
373 Similarly, *Ec*RecA bound to both forms of DNA (Figure S7B). RecA is known to  
374 catalyze the branch invasion and migration at the site of DNA damage (Komori et al.,  
375 1999). We hypothesized that the DNA binding property of RecA might be altered in  
376 the presence of  $\beta$ C1. As SyYVCV  $\beta$ C1 has a strong affinity to ssDNA and rather a  
377 weak binding to dsDNA of smaller length, the assay was designed to probe the  
378 ability of RecA to bind dsDNA in the presence of WT  $\beta$ C1 or its truncation mutants.  
379 Interestingly, dsDNA binding of RecA was significantly altered with  $\beta$ C1 (Figure 6C).  
380 As shown earlier, the N-terminal half of  $\beta$ C1 was responsible for binding to RecA.  
381 Titrating ( $\delta$ C59) N-terminal half of  $\beta$ C1 protein with RecA reduced binding (Figure  
382 6D), whereas, C-terminal half of  $\beta$ C1 ( $\delta$ N59) did not alter the DNA binding property  
383 of RecA (Figure S7C). These results suggest that  $\beta$ C1s interaction with *Nt*RecA1  
384 alters the dsDNA binding ability of the latter.

### 385 ***Nt*RecA1 augments viral replication in host plants**

386 *Geminivirus* replicative forms require assistance from host DNA repair machinery to  
387 form a complete genome (Singh et al., 2007; Yao et al., 2011; Richter et al., 2016).  
388 We tested whether the interaction of  $\beta$ C1 with *Nt*RecA1 alters viral replication by  
389 performing a viral replication assay (Figure 7A). p35S::*Nt*RecA1-HA and GFP- $\beta$ C1  
390 were co-infiltrated along with SyYVCV DNA-A in *N. benthamiana* and *N. tabacum*.  
391 Viral RFs were analysed using SB. As controls, p35S::GFP was used along with an  
392 empty vector. As expected and previously observed (Nair et al., 2020),  $\beta$ C1  
393 enhanced viral titre (Figure 7A). In the presence of *Nt*RecA1 and WT  $\beta$ C1, but not  
394 with  $\beta$ C1-DM mutant, the accumulation of viral replicons increased. qPCR analysis of  
395 Rep (C1) region also suggested an additive effect of *Nt*RecA1 in the presence of  
396  $\beta$ C1 but not with  $\beta$ C1-DM (C-terminal tagged  $\beta$ C1, functionally inactive) (Figure 7B).  
397 We also performed a similar experiment in *N. tabacum* where we used *Nt*RecA1  
398 and *Nt*RecA3 in a time-course analysis of viral replication (Figure S8A). Viral  
399 SyYVCV DNA-A replication was higher in all the time-points in the presence  
400 of *Nt*RecA1 but not with *Nt*RecA3 (Figure S8A and B). These results suggested that  
401 the ability of  $\beta$ C1 to alter the DNA binding property of RecA1 is beneficial to viral  
402 replication.



### 403 **RecA1 enhances $\beta$ C1-derived viral symptoms**

404  $\beta$ C1 is responsible for chloroplastic DNA degradation and chlorosis during infection  
405 (Figure 1). To analyse the function of its interaction with RecA1, we infected DNA-A  
406 or DNA-A+ $\beta$  in combination with PVX-RecA1 or PVX-antisense-RecA1 (anti-RecA1)  
407 (Figure 7C) on *N. tabacum* leaves. There was no difference observed in DNA-A-  
408 induced symptoms in the presence of either *Nt*RecA1 or anti-*Nt*RecA1 (Figure 7C,  
409 left panel). Interestingly, we observed an increase in chlorosis and large necrotic  
410 areas in DNA-A+ $\beta$  when co-infected with *Nt*RecA1 compared to anti-RecA1 (Figure  
411 7C, middle panel and 7E). This result is in agreement with the results of viral  
412 replication assay. Neither *Nt*RecA1 nor anti-*Nt*RecA1 produced any chlorosis or  
413 necrosis when expressed alone (Figure 7C, right panel and Figure S8C), suggesting  
414 that *Nt*RecA1 can only augment symptom determinant function of  $\beta$ C1.  
415 Correspondingly, we observed an increase in some of the PVX- $\beta$ C1 symptoms upon  
416 co-infection with RecA1 as compared to antisense-*Nt*RecA1 (Figure S8C and D).  
417 Additionally, large necrotic spots were observed in DNA-A+ $\beta$  but not in DNA-  
418 A+ $\beta$ m $\beta$ C1 in the presence of *Nt*RecA1 (Figure 7D and F). Interestingly, DPD1  
419 expression was upregulated in presence of WT  $\beta$ C1 irrespective of *Nt*RecA1 (Figure  
420 S8E). These results suggest that RecA1 directly or indirectly increases viral  
421 symptoms in the presence of DNA- $\beta$  coding for  $\beta$ C1.

422

### 423 **Discussion**

424 A mature plant cell contains hundreds of chloroplasts. Each chloroplast contains a  
425 relatively small-sized genome (cpDNA, 100-200 kb) in multiple copies (Day and  
426 Madesis, 2007; Sakamoto and Takami, 2018; Sato et al., 2003). In tobacco,  
427 Arabidopsis and in maize, cpDNA remains relatively stable until senescence  
428 (Golczyk et al., 2014). The high copy number of cpDNA is essential for adequate  
429 rRNA production required to sustain the arduous photosynthetic apparatus (Bendich,  
430 1987; Udy et al., 2012). A significant decrease in cpDNA copy number severely  
431 affects the photosynthetic and metabolic process of the cell. Subunits of important  
432 photosynthetic enzymes are not abundant when compared to the cpDNA-coded  
433 mRNAs, suggesting the role of translational machinery as a checkpoint for  
434 chloroplastic efficiency. This observation suggests the importance of efficiently  
435 maintaining the cpDNA copy number during growth and development (Eberhard et  
436 al., 2002; Hosler et al., 1989). The relatively constant and high copy number of

437 cpDNA is maintained by nucleoid-dedicated replication repair and organization  
438 proteins. A nucleoid proteome study identified a complex of 33 proteins involved in  
439 the homeostasis of cpDNA nucleoid (Majeran et al., 2012). The complex was  
440 enriched in replication (Polymerase IA, DNA Gyrase A and B etc.) and repair  
441 machinery (MutS, UV-REPAIR proteins (UvrB/C), PHOTOLYASES, and RecA  
442 orthologs). ssDNA and dsDNA breaks are very common in plant genomes due to the  
443 process of photosynthesis as well as their sessile nature (Noctor and Foyer, 2016;  
444 Bray and West, 2005; Fulcher and Sablowski, 2009). A dynamic and versatile DDR  
445 machinery to cope with such stresses is observed across plants (reviewed in  
446 (Manova and Gruszka, 2015). Homologs of bacterial RecA proteins are crucial for  
447 the maintenance of the organellar genome. RecA homologs, especially RecA1 forms  
448 complex with various DDR members to maintain the integrity of the plastid genome  
449 (Odahara et al., 2017; INOUE et al., 2008; Odahara et al., 2015b, 2015a).  
450 *Arabidopsis cprecA* mutant lines had a drastic effect on the organelle function due to  
451 loss of genomic integrity and uncontrolled recombination in cpDNA. cpDNA copy  
452 number was further reduced upon removing other RecA orthologs like DRT proteins,  
453 suggesting an active role of RecA1 protein in the stability of the plastid genome  
454 (Rowan et al., 2010). It is not surprising that a pathogenicity determinant protein of a  
455 geminivirus, a group of viruses with archael origin, have evolutionarily conserved  
456 interactions with a DDR protein, such as RecA in bacteria and RecA1 in plants.  
457 We observed pronounced misregulation of defense and hormone signalling  
458 pathways in transgenic  $\beta$ C1 expressing plants (Figure S1D). While these might have  
459 contributed to the phenotypes observed in these plants (Figure S1E), the differential  
460 expression of a set of DDR genes was surprising (Figure S2A). The deregulation of  
461 DDR genes in  $\beta$ C1 transgenic plants in the absence of viral infection indicated the  
462 direct role of  $\beta$ C1, independent of viral replication. Interaction of  $\beta$ C1 with viral  
463 genome might direct DDR proteins to viral DNA and or,  $\beta$ C1 might play a direct role  
464 in the genomic instability of host cells. Interestingly, in our transcriptome data, we  
465 also observed a large number of chloroplastic genes misexpressed. SyYVCV  $\beta$ C1  
466 localizes to the chloroplast and chlorosis was observed only in the presence of  $\beta$ C1.  
467 As expected, plastid DNA levels reduced in these plants and indicated a clear role  
468 for  $\beta$ C1 in organellar genome instability (Figure 1).  
469 The ability of  $\beta$ C1 to induce genomic instability was due to its DNA binding ability  
470 and an associated nuclease activity, the latter due to its interacting nuclease

471 partners.  $\beta$ C1 associated nuclease activity led to induction of genotoxic stress in  
472 bacterial and plant cells deficient in DDR functions (Figure 2). We assume, in repair  
473 proficient cells,  $\beta$ C1 induced genotoxic stress is countered by cellular DDR  
474 machinery, allowing the affected cells to survive. In agreement with this,  $\beta$ C1  
475 expressing cells did not survive a sub-lethal UV or bleomycin treatment. The  
476 genotoxic activity of  $\beta$ C1 in *E. coli* can be extrapolated to its role during plant  
477 infection, where plastid DNA degradation and cell death are associated with its  
478 expression. Additional sub-lethal stress was essential for tipping the balance of  
479 repair and damage in genotoxicity assay in *E. coli* cells, whereas in plants, replicating  
480 virus might act as the additional stress. Based on our observations,  $\beta$ C1 directly  
481 appears to inhibit RecA1 from protecting cpDNA and possibly redirects RecA1 for  
482 virus replication. Simultaneously,  $\beta$ C1 induced a plastid specific nuclease, DPD1, to  
483 induce cpDNA degradation. DPD1 is a  $Mg^{2+}$  dependent exonuclease well known to  
484 degrade organellar DNA (Sakamoto and Takami, 2018).  
485 Reduction in plastid genome results in decreased coding capacity and perturbation  
486 in the structure of chloroplast, significantly altering its antiviral response-ability. As a  
487 consequence, SA induced PATHOGENESIS RELATED GENE (PR) expression is  
488 severely repressed. SA is synthesized in chloroplast and is regulated by plastid  
489 retrograde signalling mediated by ROS.  $\beta$ C1 selectively disrupts plastid signalling,  
490 down-regulating ROS as was evident in  $\beta$ C1 transgenic plants. The m $\beta$ C1 without  
491 genotoxic activity neither affected plastid DNA nor was able to repress PR gene  
492 expression (Figure S8F and G). Alternatively, as geminivirus infects differentiated  
493 cells, availability of raw materials for replication is limited. Degradation of the plastid  
494 genome by DPD1 might be a common mechanism to cope with phosphate  
495 deprivation (Takami et al., 2018) and might be the key player of active salvage  
496 pathway (Tang and Sakamoto, 2011). Nucleic acids and phospholipids are the most  
497 abundant source of phosphorous esters. Multiple copies of the organellar genome  
498 can encrypt massive storage of phosphate that a virus might exploit during  
499 replication. In accordance with the hypothesis, along with DPD1, we also observed  
500 significant upregulation of bifunctional nuclease (BFN1) that are well characterized  
501 for their role in salvaging RNA during senescence (Figure S2A) (Pérez-Amador et  
502 al., 2000). Organellar DNA serves as a “dispensable” phosphate source that can be  
503 readily tapped into without significantly disturbing the cellular homeostasis. Nutrient  
504 stress leads to reduction in organellar DNA and relocation of vital minerals, similar

505 scenario should also exist in cell-cycle exited cell during viral replication. Such  
506 possibilities are interesting and might be of future interest in other plant-pathogen  
507 interactions. It is worth mentioning that most plant pathogens induce chlorosis and  
508 necrosis in susceptible host plants.

509 The interaction of  $\beta$ C1 with RecA1 appears to have a profound effect on latter's  
510 function (Figure 6). The impact of this modulation of the dsDNA binding ability of  
511 RecA bound with  $\beta$ C1 is currently unknown. Since this interaction of  $\beta$ C1 with RecA1  
512 has functional significance in terms of augmenting viral titre and infection symptoms,  
513 for example, chlorosis and necrotic symptoms were enhanced in the presence of  
514  $\beta$ C1 and RecA1, it is clear that this interaction helps  $\beta$ C1 as a pathogenicity  
515 determinant. In agreement with this, upon co-infection of  $\beta$ C1 with RecA1, we  
516 observed an increase in  $\beta$ C1-induced symptoms. However, the exact functional  
517 significance of the interaction between  $\beta$ C1 and RecA1 is yet to be understood.

518 The cellular repair pathway plays an important role in maintaining the integrity of the  
519 nuclear as well as organellar genome (Kunkel, 2004). We observed recombination  
520 proteins like RecA-cluster (RecBCD, RecQ, and RecF), *dnak* and *dnaJ* in  $\beta$ C1 AF-  
521 MS, suggesting interaction and modulation of the DDR machinery by  $\beta$ C1 (Table  
522 S1). In plants, *NtdnaJ* an important DDR member, was transcriptionally upregulated  
523 in  $\beta$ C1 transgenic lines (Yamamoto et al., 2005; Majeran et al., 2012). Considering  
524 these evidences, it is also highly likely that  $\beta$ C1 is directly involved in replication and  
525 repair of virus RFs, guiding cellular machinery to viral replisome in host nucleus.

526 Here we identified a DDR protein RecA1 as a functional partner of viral pathogenicity  
527 protein  $\beta$ C1. Other than its observed functions in the chloroplast that we elucidated  
528 here,  $\beta$ C1 might also recruit RecA1 into the viral replication complex to assist in the  
529 RF repair process. Evidence for this aspect of the interaction between RecA1 and  
530  $\beta$ C1 needs further experimentation.

531

## 532 **Methods**

### 533 **Plasmids and cloning**

534 Cloning was performed as previously described (Nair et al., 2020). Briefly, the partial  
535 dimer of DNA-A and DNA- $\beta$  was amplified from pSD30 and pSD35, respectively, and  
536 cloned into pBIN19 using BamHI and SacI sites (Das et al., 2018). For plant  
537 transformation and transient expression,  $\beta$ C1 and RecA proteins were cloned into  
538 modified pBIN19 (35S CAMV promoter) vectors using BamHI and SacI sites for  $\beta$ C1,

539 and BamHI and XhoI for RecA proteins. For  $\beta$ C1 fusion constructs,  $\beta$ C1 was  
540 amplified using primers AN34 and AN35 containing Sall and SacI (Table S2). eGFP  
541 was amplified from pMEL2 (pBIN HSP30-eGFP) using primer pair AN30 and AN31  
542 having BamHI and Sall along with a short linker sequence (Gly-Gly-Ser-Gly). The  
543 vector pBIN-GFP was digested with BamHI and SacI to release ~700-bp product.  
544  $\beta$ C1 amplicon was digested with Sall and SacI and eGFP amplicon was digested  
545 with BamHI and Sall. A three fragment ligation was performed using  $\beta$ C1 fragment,  
546 eGFP fragment, and linearized vector. For recombinant protein purification vectors,  
547 the pMAL-p5E vector has an AMP<sup>r</sup> resistance gene and a maltose-binding protein  
548 (MBP) ORF driven by a TAC promoter. The MCS is at the C-terminus of MBP protein  
549 just after an enterokinase cleavage site.  $\beta$ C1 (insert) was amplified from pAN3 using  
550 primer pair AN3 and AN4 containing KpnI, precision protease cleavage site (Leu Glu  
551 Val Leu Phe Gln/Gly Pro) in AN3 and XhoI, NotI sites in AN4. pMAL-p5E vector and  
552  $\beta$ C1 were digested with KpnI and NotI. The substitution mutations in  $\beta$ C1 were  
553 generated using overlapping PCR primers harbouring the required modification or by  
554 site-directed mutagenesis kit (Invitrogen). Primer and plasmid used in the study are  
555 detailed in (Tables S2, S3 and S4).

#### 556 **Recombinant protein purification**

557 For protein purification, BL21 (DE3) or Rosetta-Gammi (DE3) (Novagen) cells were  
558 typically used unless otherwise mentioned. For purification of  $\beta$ C1 and its mutants,  
559 cells were grown to OD 0.7 at 37°C and induced with 0.3 mM IPTG at 20°C. The  
560 induced culture was incubated with shaking at 16°C for 18 h. The cells were pelleted  
561 and lysed using sonication (10 sec on and off for 15 cycles, 60% amplitude) in the  
562 lysis buffer (50 mM Tris-Cl pH-8, 500 mM NaCl, 5% glycerol, 5 mM 2-  
563 mercaptoethanol, Igepal 0.01%, and protease inhibitor tablets (Roche)). The lysate  
564 was clarified using centrifugation and the supernatant was passed through pre-  
565 equilibrated dextrin-sepharose beads (GE). Non-specific protein binding was washed  
566 off using high salt washes and the bound protein was eluted with 12 mM maltose.  
567 The eluted protein was concentrated using amicon filters (Millipore). The  
568 concentrated protein was then passed through a Q-sepharose (ion-exchange  
569 column, GE) and protein was eluted using NaCl gradient. The ion-exchanged  
570 purified protein was further concentrated and passed through a size-exclusion  
571 column (SD-200, HiLoad 16/600 200 pg superdex preparative column (GE)) and the



572 protein fraction was concentrated and stored in storage buffer (25 mM Tris-Cl pH-8,  
573 100 mM NaCl, 5% glycerol) at -80°C.

#### 574 **Transgenic plants and transient expression**

575 Transformation of tobacco (*N. tabacum*, Wisconsin 35) was performed as described  
576 previously (Sunilkumar et al., 1999; Nair et al., 2020). Briefly, leaf discs prepared  
577 from 3 week-old *N. tabacum* plants were infected with *Agrobacterium* strain  
578 LBA4404 (pSB1) harboring genes of interest (Stachel and Zambryski, 1986;  
579 Yanofsky et al., 1986). Transformants were selected on a kanamycin medium.  
580 Transient over-expression was performed on 3 to 4 week old *N. tabacum* leaves  
581 using *Agrobacterium* LBA4404 (pSB1) strains having appropriate genes, suspended  
582 in an infiltration buffer (10 mM MES, 10 mM MgCl<sub>2</sub>, pH 5.7, and 100 µM  
583 acetosyringone). A culture of 0.6 OD was used for infiltration unless otherwise  
584 mentioned. The resuspended culture was incubated for 1 h before infiltration. For  
585 protein expression studies and replication assays a 1:1 ratio of the culture of the  
586 same OD was premixed and then infiltrated using a needle-less 1 ml syringe onto  
587 2nd whorl of leaves from the top of either *N. tabacum* or *N. benthamiana*. Samples  
588 were collected only from the infiltrated area of the leaves in all samples.

#### 589 **RNA sequencing analysis**

590 RNA sequencing analysis was done as previously described (Jha et al., 2021).  
591 Paired-end (100 × 2) RNA-seq reads were adapter trimmed using CUTADAPT (Martin,  
592 2011) and aligned to the genome (*N. tabacum* :TN-90) using HISAT2 (Kim et al.,  
593 2019). Differentially expressed genes were identified using Cuffdiff with log<sub>2</sub> fold  
594 change > 1.5 (Trapnell et al., 2011), and GO analysis was performed using Panther  
595 (Mi et al., 2021).

#### 596 **Plant growth conditions**

597 For phenotyping of plants, 2-week old rooted plants grown in rooting media were  
598 transferred to soil and kept in a controlled environment (growth-chamber,  
599 temperature: 24°C, light: 4 LSI light with 12 h cycle and RH 70%) for 1 week to  
600 acclimatize. Hardened plants were further transferred to larger pots in transgenic  
601 green-house (temperature: 24°C, RH 70-80% and natural light cycle).

#### 602 **Plant total protein isolation and western blotting**

603 Total protein was isolated using the acetone-phenol extraction method (Wang et al.,  
604 2006; Nair et al., 2020). Briefly, 200 mg of tissue was finely ground in liquid nitrogen,  
605 and protein was precipitated by 10% TCA (trichloroacetic acid, Sigma) in acetone,

606 The resultant pellet was washed with 0.1 M ammonium acetate in 80% methanol  
607 followed by 80% acetone wash. The acetone extracted pellet was briefly dried to  
608 remove excess acetone and further extracted with 1:1 ratio SDS extraction buffer  
609 (850 mM sucrose, 100 mM Tris-Cl pH-8, 750 mM 2-mercaptoethanol, and 2% SDS)  
610 and phenol (pH-8.0 Tris-saturated). The supernatant was precipitated overnight  
611 using 0.1 M ammonium acetate in 100% methanol at -20°C. Precipitated protein was  
612 pelleted (13000 rpm for 30 min) and was washed once with 100% methanol and then  
613 with 80% acetone, air-dried, and resuspended in 2X SDS lamelli sample loading  
614 buffer containing 6 M urea and 1% CHAPS.

615 For western blot analysis, 20 µg of total protein was loaded either on a 12% Tris-  
616 Glycine SDS gel or 4-20% Bio-Rad precast gels. The gel was resolved under  
617 constant voltage (100 V). Resolved proteins were transferred to a nylon membrane  
618 (GE (Amersham) Protran, 0.2 µm) using the Bio-Rad protran transblot apparatus.  
619 The transfer was performed for 120 min at a constant voltage of 90 under the ice  
620 with transfer buffer maintained at 18-20°C. The blot was washed with TBST (TBS  
621 with 0.1% tween 20) and was blocked with either 5% blotting grade blocker (Bio-  
622 Rad) or 4% BSA (Sigma) in TBST. Blocked membranes were probed for the protein  
623 of interest using specific antibodies and imaged using Image quant 4000 LAS in  
624 chemiluminescence mode (GE). Stripping of blots was done at room temperature  
625 (Restore western stripping buffer, Thermo Fisher) according to the manufacturer's  
626 instructions. Bands were quantified and normalized using FIJI software. Antibodies  
627 used in this study are listed in Table S5.

### 628 **Immuno-precipitation**

629 Immuno-precipitation was performed as previously described (Nair et al., 2020).  
630 Briefly, infiltrated or transgenic plant leaves expressing the protein of interest were  
631 finely powdered under liquid nitrogen. Three volumes of lysis buffer (50 mM Tris-Cl  
632 pH 7.4, 150 mM KCl, 1% Triton-X100, Protease inhibitor 1 X [Roche], NEM 20 µM)  
633 was added to 2 g of powdered tissue. The lysate was clarified by high-speed  
634 centrifugation and incubated with GFP-Trap (Chromtek) for 3h at 4°C. Beads were  
635 magnetically separated from the lysate and washed 5 times in wash buffer (50 mM  
636 Tris-Cl, pH 7.4; 150 mM KCl, 1 mM PMSF) until the green colour completely  
637 disappeared. The washed beads were transferred to a 1.5 ml tube and again  
638 washed twice with wash buffer. The buffer was completely removed and 3X SDS

639 sample dye was added to the beads and incubated at 70°C for 10 min. The pull-  
640 down products were resolved in 4-20% Tris-Glycine SDS gradient gels (Bio-Rad).

#### 641 **Mass-Spectrometry**

642 In-solution digestion of the purified protein was performed using 13 ng  $\mu\text{l}^{-1}$  trypsin in  
643 10 mM ammonium bicarbonate containing 10% (v/v) acetonitrile. Approximately 50  
644 ng of the prepared samples was subjected to liquid chromatography/tandem mass  
645 spectrometry (LC-MS/MS), using a LTQ Orbitrap XL (Thermo Scientific), HCD  
646 activation, C-18 column, 15 cm length. The data was analysed using Proteome  
647 Discoverer (Thermo Scientific). For peptide identification, Sequest HT search engine  
648 was used against the combined target-decoy database with the following  
649 parameters: enzyme: trypsin; maximum missed cleavage: two; variable  
650 modifications: oxidation. Search tolerance parameters were as follows: minimum  
651 peptide length; 6, maximum; 144, false discovery rate, <1%.

#### 652 **Viral replication assay and Southern blotting**

653 Viral titre assay was performed as previously shown (Shivaprasad et al., 2008, 2006;  
654 Nair et al., 2020). Partial dimer of SyYVCV DNA-A, DNA- $\beta$ , and 35S driven plasmids  
655 were mobilized into *Agrobacterium* strain LBA4404 (pSB1) and co-infiltrated alone or  
656 in various combinations into *N. tabacum* leaves. Genomic DNA from infiltrated and  
657 systemic leaves were isolated using the CTAB method (Rogers and Bendich, 1994).  
658 An equal amount of genomic DNA normalized using Qubit and gel-based  
659 quantification was loaded onto a 0.7% TNE agarose gel and resolved at 5 V/cm. The  
660 transfer was performed as previously mentioned (Shivaprasad et al., 2006) and blots  
661 were probed with full-length DNA-A in case of replication assay and psbM gene  
662 probe (3-kb) for plastid Southern blot. The probes were internally labelled with dCTP  
663 alpha P32 (BRIT, India) using the Rediprime II kit (GE). Blots were scanned using  
664 Typhoon Trio Scanner (GE) in phosphorescence mode.

#### 665 **Yeast two-hybrid transformation and screening**

666 Yeast transformation was performed as described with minor modifications (Gietz  
667 and Woods, 2002). Freshly streaked AH109 cells were used to initiate primary  
668 culture grown overnight in YPD media (yeast extract 1%, bacterial peptone 2%, and  
669 dextrose 2%). Cells were grown to A600 = 0.6 OD. About 10 ml of cells were  
670 pelleted per transformation. The freshly pelleted cells were transferred to a 1.5 ml  
671 centrifuge tube and washed with deionized sterile water followed by 0.1 M lithium  
672 acetate. Transformation mixture (PEG 3000 50%, salmon sperm DNA and lithium

673 acetate) was added to the washed cells, and cells were resuspended. The  
674 corresponding mixture of AD and BD plasmids was added to the transformation  
675 mixture followed by vortexing for 30 s. The mixture was incubated for 30 min at 30°C  
676 and 30 min at 42°C. The reaction mixture was removed and cells were resuspended  
677 in 2 ml YPD media and allowed to recover for 2h before plating onto an auxotrophic  
678 media. All Rec and Rad proteins were translationally fused with the Activation  
679 Domain (AD) of pGADT7 AD (Takara Bio).  $\beta$ C1 was fused with Binding Domain (BD)  
680 and cloned into pGBKT7 BD (Takara Bio). Plasmids were transformed into AH109  
681 strain as described previously (Gietz and Woods, 2002). Transformants were  
682 screened on -Leu, -Trp media followed by screening for interaction on -Leu, - Trp, -  
683 His with or without 3-AT (Sigma-Aldrich).

#### 684 **Electrophoretic Mobility Shift Assay (EMSA)**

685 EMSA was performed as previously described (Csorba and Burgyán, 2011). Briefly,  
686 oligos were end-labelled using T4 polynucleotide kinase (NEB) with  $\gamma$ -<sup>32</sup>P. Labelled  
687 oligos were diluted as mentioned for each experiment typically to 100 to 200 pg.  
688 Labelled oligos were incubated with protein in EMSA binding buffer (50 mM Tris-Cl  
689 pH-8, 100 mM NaCl, 5% glycerol) for a specific time interval as detailed in the  
690 experiment followed by stopping the reaction by addition of non-denaturing stop-dye.  
691 The reaction was further resolved in an 8% native TBE gel and exposed to a  
692 phosphor screen for development. The phosphor screen was scanned using  
693 Typhoon trio plus (GE) and the image was analysed using FIJI. For nuclease assay,  
694 buffer contained 50 mM Tris-Cl pH-8, 100 mM NaCl, 5% glycerol and 5 mM Mg<sup>2+</sup>

## Figure details:

### Main Figures:

**Figure 1:**  $\beta$ C1 selectively degrades chloroplastic DNA.

**Figure 2:** SyYVCV  $\beta$ C1 displays genotoxicity in *E.coli* and associated nuclease activity *in-vitro*.

**Figure 3:** Demarcation of multimerization domain of  $\beta$ C1.

**Figure 4:** SyYVCV  $\beta$ C1 C-terminal end is required for genotoxicity.

**Figure 5:** NtRecA1 interacts with SyYVCV  $\beta$ C1.

**Figure 6:**  $\beta$ C1 modulates DNA binding property of RecA.

**Figure 7:** RecA1 augments pathogenicity determinant function of  $\beta$ C1.

## Supplementary information

### Manuscript has 9 Supplementary Figures and 5 Supplementary Tables

#### Supplementary figures:

**Figure S1:** Signalling pathways are deregulated in  $\beta$ C1 transgenic lines.

**Figure S2:** Plastid localised genes are significantly misexpressed in  $\beta$ C1-OE lines.

**Figure S3:**  $\beta$ C1 binds preferably to ssDNA *in vitro*.

**Figure S4:** Size exclusion profile of  $\beta$ C1 and its truncation mutants.

**Figure S5:** Plant *RecA*, a *Rad51* homolog, is essential for cell survival in presence of  $\beta$ C1.

**Figure S6:** RecA directly interacts with SyYVCV  $\beta$ C1.

**Figure S7:** NtRecA1 binds to DNA.

**Figure S8:** RecA1 enhances viral replication in the presence of  $\beta$ C1.

**Figure S9:** Full images of cropped blots and plates.

#### Supplementary Tables

**Table S1:** Mass-spec identified interacting proteins in *E.coli* purified  $\beta$ C1.

**Table S2:** List of primers used in this study.

**Table S3:** List of clones used in this study.

**Table S4:** List of Sequence Id's used to construct clones.

**Table S5:** List of antibodies and IP materials used in this study.



## **ACKNOWLEDGMENTS**

We thank members of Shivaprasad lab for suggestions. We thank the Next Generation Genomics, radiation, CIFF and mass-spec at NCBS-TIFR, Bangalore. We thank Dr. Anjana Badrinarayanan and Afroze C. for critical discussion on RecA function and for cvRecA antibody. We also thank Prof. K. Veluthambi for binary vectors and *Agrobacterium* strains. This study was supported by Department of Atomic Energy, Government of India, under Project Identification No. RTI 4006 (1303/3/2019/R&D-II/DAE/4749 dated 16.7.2020). ANN acknowledges a fellowship from DBT, India. This work was also supported by NCBS-TIFR core funding and grants (BT/PR12394/AGIII/103/891/2014; BT/IN/Swiss/47/JGK/2018-19; BT/PR25767/GET/119/151/ 2017) from Department of Biotechnology, Government of India.

## **AVAILABILITY OF DATA AND MATERIALS:**

All data generated or analysed during this study are included in this published article (and its supplementary information files) Source data for all the images, gels and blots used in the study are provided as original raw file, and images or blots used in the figure files are also provided as uncropped images with relevant area labelled. RNA-Seq data is available under GEO accession number: GSE189526.

## **AUTHOR CONTRIBUTIONS**

AN and PVS designed the study, analyzed the data and wrote the manuscript. AN performed almost all the experiments. HCY helped with PVX and tobacco transgenics. ANN helped with transcriptome analysis.

## **Competing interests**

The authors declare no conflicts of interest.

## References

- Ascencio-Ibáñez, J.T., Sozzani, R., Lee, T.-J., Chu, T.-M., Wolfinger, R.D., Cella, R., and Hanley-Bowdoin, L.** (2008). Global Analysis of Arabidopsis Gene Expression Uncovers a Complex Array of Changes Impacting Pathogen Response and Cell Cycle during Geminivirus Infection. *Plant Physiol.* **148**: 436–454.
- Bendich, A.J.** (1987). Why do chloroplasts and mitochondria contain so many copies of their genome? *BioEssays* **6**: 279–282.
- Bhattacharyya, D., Gnanasekaran, P., Kumar, R.K., Kushwaha, N.K., Sharma, V.K., Yusuf, M.A., and Chakraborty, S.** (2015). A geminivirus betasatellite damages the structural and functional integrity of chloroplasts leading to symptom formation and inhibition of photosynthesis. *J. Exp. Bot.* **66**: 5881–5895.
- Bray, C.M. and West, C.E.** (2005). DNA repair mechanisms in plants: crucial sensors and effectors for the maintenance of genome integrity. *New Phytol.* **168**: 511–528.
- Briddon, R.W. et al.** (2003). Diversity of DNA  $\beta$ , a satellite molecule associated with some monopartite begomoviruses. *Virology* **312**: 106–121.
- Cerutti, H., Osman, M., Grandoni, P., and Jagendorf, A.T.** (1992). A homolog of Escherichia coli RecA protein in plastids of higher plants. *Proc. Natl. Acad. Sci.* **89**: 8068–8072.
- Chan, K.X., Crisp, P.A., Estavillo, G.M., and Pogson, B.J.** (2010). Chloroplast-to-nucleus communication. *Plant Signal. Behav.* **5**: 1575–1582.
- Chan, K.X., Phua, S.Y., Crisp, P., McQuinn, R., and Pogson, B.J.** (2016). Learning the Languages of the Chloroplast: Retrograde Signaling and Beyond. *Annu. Rev. Plant Biol.* **67**: 25–53.

- Chandran, D., Rickert, J., Huang, Y., Steinwand, M.A., Marr, S.K., and Wildermuth, M.C.** (2014). Atypical E2F Transcriptional Repressor DEL1 Acts at the Intersection of Plant Growth and Immunity by Controlling the Hormone Salicylic Acid. *Cell Host Microbe* **15**: 506–513.
- Chappell, W.H., Gautam, D., Ok, S.T., Johnson, B.A., Anacker, D.C., and Moody, C.A.** (2016). Homologous Recombination Repair Factors Rad51 and BRCA1 Are Necessary for Productive Replication of Human Papillomavirus 31. *J. Virol.* **90**: 2639–2652.
- Cheng, X., Wang, X., Wu, J., Briddon, R.W., and Zhou, X.** (2011).  $\beta$ C1 encoded by tomato yellow leaf curl China betasatellite forms multimeric complexes in vitro and in vivo. *Virology* **409**: 156–162.
- Choi, H.W. and Klessig, D.F.** (2016). DAMPs, MAMPs, and NAMPs in plant innate immunity. *BMC Plant Biol.* **16**: 232.
- Clerot, D. and Bernardi, F.** (2006). DNA Helicase Activity Is Associated with the Replication Initiator Protein Rep of Tomato Yellow Leaf Curl Geminivirus. *J. Virol.* **80**: 11322–11330.
- Csorba, T. and Burgyán, J.** (2011). Gel Mobility Shift Assays for RNA Binding Viral RNAi Suppressors. In *Methods in Molecular Biology*, pp. 245–252.
- Cui, X., Tao, X., Xie, Y., Fauquet, C.M., and Zhou, X.** (2004). A DNA $\beta$  Associated with Tomato Yellow Leaf Curl China Virus Is Required for Symptom Induction. *J. Virol.* **78**: 13966–13974.
- Das, S., Hegde, A., and Shivaprasad, P. V.** (2018). Molecular characterization of a new begomovirus infecting *Synedrella nodiflora* in South India. *Arch. Virol.* **163**: 2551–2554.
- Day, A. and Madesis, P.** (2007). DNA replication, recombination, and repair in plastids. In *Topics in Current Genetics*, pp. 65–119.
- Eberhard, S., Drapier, D., and Wollman, F.-A.** (2002). Searching limiting steps in the expression of chloroplast-encoded proteins: relations between gene copy number, transcription, transcript abundance and translation rate in the chloroplast of *Chlamydomonas reinhardtii*. *Plant J.* **31**: 149–160.

- Fondong, V.N., Reddy, R.V.C., Lu, C., Hankoua, B., Felton, C., Czymmek, K., and Achenjang, F.** (2007). The Consensus N -Myristoylation Motif of a Geminivirus AC4 Protein Is Required for Membrane Binding and Pathogenicity. *Mol. Plant-Microbe Interact.* **20**: 380–391.
- Fulcher, N. and Sablowski, R.** (2009). Hypersensitivity to DNA damage in plant stem cell niches. *Proc. Natl. Acad. Sci.* **106**: 20984–20988.
- Gietz, R.D. and Woods, R.A.** (2002). Transformation of yeast by lithium acetate/single-stranded carrier DNA/polyethylene glycol method. *Methods Enzymol.* **350**: 87–96.
- Gnanasekaran, P., Gupta, N., Ponnusamy, K., and Chakraborty, S.** (2021). Correction for Gnanasekaran et al., “Geminivirus Betasatellite-Encoded  $\beta$ C1 Protein Exhibits Novel ATP Hydrolysis Activity That Influences Its DNA-Binding Activity and Viral Pathogenesis.” *J. Virol.* **95**.
- Gnanasekaran, P., Ponnusamy, K., and Chakraborty, S.** (2019). A geminivirus betasatellite encoded  $\beta$ C1 protein interacts with PsbP and subverts PsbP-mediated antiviral defence in plants. *Mol. Plant Pathol.* **20**: 943–960.
- Golczyk, H., Greiner, S., Wanner, G., Weihe, A., Bock, R., Börner, T., and Herrmann, R.G.** (2014). Chloroplast DNA in Mature and Senescing Leaves: A Reappraisal . *Plant Cell* **26**: 847–854.
- Grant, M.R. and Jones, J.D.G.** (2009). Hormone (Dis)harmony Moulds Plant Health and Disease. *Science* (80-. ). **324**: 750–752.
- Hanley-Bowdoin, L., Bejarano, E.R., Robertson, D., and Mansoor, S.** (2013). Geminiviruses: masters at redirecting and reprogramming plant processes. *Nat. Rev. Microbiol.* **11**: 777–788.
- Heyraud-Nitschke, F., Schumacher, S., Laufs, J., Schaefer, S., Schell, J., and Gronenborn, B.** (1995). Determination of the origin cleavage and joining domain of geminivirus Rep proteins. *Nucleic Acids Res.* **23**: 910–916.
- Heyraud, F., Matzeit, V., Kammann, M., Schaefer, S., Schell, J., and Gronenborn, B.** (1993). Identification of the initiation sequence for viral-strand DNA synthesis of wheat dwarf virus. *EMBO J.* **12**: 4445–4452.

**Hosler, J.P., Wurtz, E.A., Harris, E.H., Gillham, N.W., and Boynton, J.E.** (1989). Relationship between Gene Dosage and Gene Expression in the Chloroplast of *Chlamydomonas reinhardtii*. *Plant Physiol.* **91**: 648–655.

**INOUE, T., ODAHARA, M., FUJITA, T., HASEBE, M., and SEKINE, Y.** (2008). Expression and Complementation Analyses of a Chloroplast-Localized Homolog of Bacterial RecA in the Moss *Physcomitrella patens*. *Biosci. Biotechnol. Biochem.* **72**: 1340–1347.

**Iriti, M. and Varoni, E.M.** (2015). Chitosan-induced antiviral activity and innate immunity in plants. *Environ. Sci. Pollut. Res.* **22**: 2935–2944.

**Jeske, H., Lütgemeier, M., and Preiß, W.** (2001). DNA forms indicate rolling circle and recombination-dependent replication of Abutilon mosaic virus. *EMBO J.* **20**: 6158–6167.

**Jha, V., Narjala, A., Basu, D., T. N., S., Pachamuthu, K., Chenna, S., Nair, A., and Shivaprasad, P. V.** (2021). Essential role of  $\gamma$ -clade RNA-dependent RNA polymerases in rice development and yield-related traits is linked to their atypical polymerase activities regulating specific genomic regions. *New Phytol.* **232**: 1674–1691.

**Kaliappan, K., Choudhury, N.R., Suyal, G., and Mukherjee, S.K.** (2012). A novel role for RAD54: this host protein modulates geminiviral DNA replication. *FASEB J.* **26**: 1142–1160.

**Kazlauskas, D., Varsani, A., Koonin, E. V., and Krupovic, M.** (2019). Multiple origins of prokaryotic and eukaryotic single-stranded DNA viruses from bacterial and archaeal plasmids. *Nat. Commun.* **10**: 3425.

**Khazi, F.R., Edmondson, A.C., and Nielsen, B.L.** (2003). An Arabidopsis homologue of bacterial RecA that complements an *E. coli* recA deletion is targeted to plant mitochondria. *Mol. Genet. Genomics* **269**: 454–463.

**Kim, D., Paggi, J.M., Park, C., Bennett, C., and Salzberg, S.L.** (2019). Graph-based genome alignment and genotyping with HISAT2 and HISAT-genotype. *Nat. Biotechnol.* **37**: 907–915.

**Komori, K., Sakae, S., Shinagawa, H., Morikawa, K., and Ishino, Y.** (1999). A



Holliday junction resolvase from *Pyrococcus furiosus*: functional similarity to *Escherichia coli* RuvC provides evidence for conserved mechanism of homologous recombination in Bacteria, Eukarya, and Archaea. *Proc. Natl. Acad. Sci. U. S. A.* **96**: 8873–8.

**Koonin, E. V. and Ilyina, T. V.** (1992). Geminivirus replication proteins are related to prokaryotic plasmid rolling circle DNA replication initiator proteins. *J. Gen. Virol.* **73**: 2763–2766.

**Kørner, C.J., Klauser, D., Niehl, A., Domínguez-Ferreras, A., Chinchilla, D., Boller, T., Heinlein, M., and Hann, D.R.** (2013). The Immunity Regulator BAK1 Contributes to Resistance Against Diverse RNA Viruses. *Mol. Plant-Microbe Interact.* **26**: 1271–1280.

**Krupovic, M., Ravantti, J.J., and Bamford, D.H.** (2009). Geminiviruses: a tale of a plasmid becoming a virus. *BMC Evol. Biol.* **9**: 112.

**Kunkel, T.A.** (2004). DNA Replication Fidelity. *J. Biol. Chem.* **279**: 16895–16898.

**León, J. and Sánchez-Serrano, J.J.** (1999). Molecular biology of jasmonic acid biosynthesis in plants. *Plant Physiol. Biochem.* **37**: 373–380.

**Ma, X., Xu, G., He, P., and Shan, L.** (2016). SERKing Coreceptors for Receptors. *Trends Plant Sci.* **21**: 1017–1033.

**Machado, J.P.B., Brustolini, O.J.B., Mendes, G.C., Santos, A.A., and Fontes, E.P.B.** (2015). NIK1, a host factor specialized in antiviral defense or a novel general regulator of plant immunity? *BioEssays* **37**: 1236–1242.

**Majeran, W., Friso, G., Asakura, Y., Qu, X., Huang, M., Ponnala, L., Watkins, K.P., Barkan, A., and van Wijk, K.J.** (2012). Nucleoid-Enriched Proteomes in Developing Plastids and Chloroplasts from Maize Leaves: A New Conceptual Framework for Nucleoid Functions . *Plant Physiol.* **158**: 156–189.

**Manova, V. and Gruszka, D.** (2015). DNA damage and repair in plants – From models to crops. *Front. Plant Sci.* **6**: 885.

**Martin, M.** (2011). Cutadapt removes adapter sequences from high-throughput sequencing reads. *EMBnet.journal* **17**: 10.

- Maslowska, K.H., Makiela-Dzbenka, K., and Fijalkowska, I.J.** (2019). The SOS system: A complex and tightly regulated response to DNA damage. *Environ. Mol. Mutagen.* **60**: 368–384.
- Medina-Puche, L., Tan, H., Dogra, V., Wu, M., Rosas-Diaz, T., Wang, L., Ding, X., Zhang, D., Fu, X., Kim, C., and Lozano-Duran, R.** (2020). A Defense Pathway Linking Plasma Membrane and Chloroplasts and Co-opted by Pathogens. *Cell* **182**: 1109-1124.e25.
- Mi, H., Ebert, D., Muruganujan, A., Mills, C., Albou, L.-P., Mushayamaha, T., and Thomas, P.D.** (2021). PANTHER version 16: a revised family classification, tree-based classification tool, enhancer regions and extensive API. *Nucleic Acids Res.* **49**: D394–D403.
- Nair, A., Chatterjee, K.S., Jha, V., Das, R., and Shivaprasad, P. V.** (2020). Stability of Begomoviral pathogenicity determinant  $\beta$ C1 is modulated by mutually antagonistic SUMOylation and SIM interactions. *BMC Biol.* **18**: 110.
- Nambara, E. and Marion-Poll, A.** (2005). ABSCISIC ACID BIOSYNTHESIS AND CATABOLISM. *Annu. Rev. Plant Biol.* **56**: 165–185.
- Nicaise, V. and Candresse, T.** (2017). *Plum pox virus* capsid protein suppresses plant pathogen-associated molecular pattern (PAMP)-triggered immunity. *Mol. Plant Pathol.* **18**: 878–886.
- Niehl, A., Wyrsh, I., Boller, T., and Heinlein, M.** (2016). Double-stranded <sc>RNA</sc> s induce a pattern-triggered immune signaling pathway in plants. *New Phytol.* **211**: 1008–1019.
- Noctor, G. and Foyer, C.H.** (2016). Intracellular Redox Compartmentation and ROS-Related Communication in Regulation and Signaling. *Plant Physiol.* **171**: 1581–1592.
- Nomura, H. et al.** (2012). Chloroplast-mediated activation of plant immune signalling in *Arabidopsis*. *Nat. Commun.* **3**: 926.
- Odahara, M., Inouye, T., Nishimura, Y., and Sekine, Y.** (2015a). RECA plays a dual role in the maintenance of chloroplast genome stability in *Physcomitrella patens*. *Plant J.* **84**: 516–526.

- Odahara, M., Kishita, Y., and Sekine, Y.** (2017). MSH1 maintains organelle genome stability and genetically interacts with *RECA* and *RECG* in the moss *Physcomitrella patens*. *Plant J.* **91**: 455–465.
- Odahara, M., Masuda, Y., Sato, M., Wakazaki, M., Harada, C., Toyooka, K., and Sekine, Y.** (2015b). RECG Maintains Plastid and Mitochondrial Genome Stability by Suppressing Extensive Recombination between Short Dispersed Repeats. *PLOS Genet.* **11**: e1005080.
- Padmanabhan, M.S. and Dinesh-Kumar, S.P.** (2010). All Hands on Deck—The Role of Chloroplasts, Endoplasmic Reticulum, and the Nucleus in Driving Plant Innate Immunity. *Mol. Plant-Microbe Interact.* **23**: 1368–1380.
- Pérez-Amador, M.A., Abler, M.L., De Rocher, E.J., Thompson, D.M., van Hoof, A., LeBrasseur, N.D., Lers, A., and Green, P.J.** (2000). Identification of BFN1, a Bifunctional Nuclease Induced during Leaf and Stem Senescence in *Arabidopsis*. *Plant Physiol.* **122**: 169–180.
- Pieterse, C.M.J., Van der Does, D., Zamioudis, C., Leon-Reyes, A., and Van Wees, S.C.M.** (2012). Hormonal Modulation of Plant Immunity. *Annu. Rev. Cell Dev. Biol.* **28**: 489–521.
- Preiss, W. and Jeske, H.** (2003). Multitasking in Replication Is Common among Geminiviruses. *J. Virol.* **77**: 2972–2980.
- Rauwolf, U., Golczyk, H., Greiner, S., and Herrmann, R.G.** (2010). Variable amounts of DNA related to the size of chloroplasts III. Biochemical determinations of DNA amounts per organelle. *Mol. Genet. Genomics* **283**: 35.
- Rekab, D., Carraro, L., Schneider, B., Seemüller, E., Chen, J., Chang, C.-J., Locci, R., and Firrao, G.** (1999). Geminivirus-related extrachromosomal DNAs of the X-clade phytoplasmas share high sequence similarity. *Microbiology* **145**: 1453–1459.
- Richter, K.S., Serra, H., White, C.I., and Jeske, H.** (2016). The recombination mediator RAD51D promotes geminiviral infection. *Virology* **493**: 113–127.
- Rizvi, I., Choudhury, N.R., and Tuteja, N.** (2015). Insights into the functional characteristics of geminivirus rolling-circle replication initiator protein and its

interaction with host factors affecting viral DNA replication. *Arch. Virol.* **160**: 375–387.

**Rowan, B.A., Oldenburg, D.J., and Bendich, A.J.** (2010). RecA maintains the integrity of chloroplast DNA molecules in *Arabidopsis*. *J. Exp. Bot.* **61**: 2575–2588.

**Sakamoto, W. and Takami, T.** (2018). Chloroplast DNA Dynamics: Copy Number, Quality Control and Degradation. *Plant Cell Physiol.* **59**: 1120–1127.

**Sato, N., Terasawa, K., Miyajima, K., and Kabeya, Y.** (2003). Organization, Developmental Dynamics, and Evolution of Plastid Nucleoids. In *International Review of Cytology*, pp. 217–262.

**Schmid, M., Speiseder, T., Dobner, T., and Gonzalez, R.A.** (2014). DNA Virus Replication Compartments. *J. Virol.* **88**: 1404–1420.

**Serrano, I., Audran, C., and Rivas, S.** (2016). Chloroplasts at work during plant innate immunity. *J. Exp. Bot.* **67**: 3845–3854.

**Seyfferth, C. and Tsuda, K.** (2014). Salicylic acid signal transduction: the initiation of biosynthesis, perception and transcriptional reprogramming. *Front. Plant Sci.* **5**.

**Shivaprasad, P. V., Rajeswaran, R., Blevins, T., Schoelz, J., Meins, F., Hohn, T., and Pooggin, M.M.** (2008). The CaMV transactivator/viroplasm interferes with RDR6-dependent trans-acting and secondary siRNA pathways in *Arabidopsis*. *Nucleic Acids Res.* **36**: 5896–5909.

**Shivaprasad, P. V., Thillaichidambaram, P., Balaji, V., and Veluthambi, K.** (2006). Expression of full-length and truncated Rep genes from Mungbean yellow mosaic virus-*Vigna* inhibits viral replication in transgenic tobacco. *Virus Genes* **33**: 365–374.

**Singh, D.K., Islam, M.N., Choudhury, N.R., Karjee, S., and Mukherjee, S.K.** (2007). The 32 kDa subunit of replication protein A (RPA) participates in the DNA replication of Mung bean yellow mosaic India virus (MYMIV) by interacting with the viral Rep protein. *Nucleic Acids Res.* **35**: 755–770.

**Stachel, S.E. and Zambryski, P.C.** (1986). *Agrobacterium tumefaciens* and the

susceptible plant cell: A novel adaptation of extracellular recognition and DNA conjugation. *Cell* **47**: 155–157.

**Stanley, J.** (1995). Analysis of African cassava mosaic virus recombinants suggests strand nicking occurs within the conserved nonanucleotide motif during the initiation of rolling circle DNA replication. *Virology* **206**: 707–712.

**Sunilkumar, G., Vijayachandra, K., and Veluthambi, K.** (1999). Preincubation of cut tobacco leaf explants promotes *Agrobacterium*-mediated transformation by increasing vir gene induction. *Plant Sci.* **141**: 51–58.

**Suyal, G., Mukherjee, S.K., and Choudhury, N.R.** (2013). The host factor RAD51 is involved in mungbean yellow mosaic India virus (MYMIV) DNA replication. *Arch. Virol.* **158**: 1931–1941.

**Takami, T., Ohnishi, N., Kurita, Y., Iwamura, S., Ohnishi, M., Kusaba, M., Mimura, T., and Sakamoto, W.** (2018). Organelle DNA degradation contributes to the efficient use of phosphate in seed plants. *Nat. Plants* **4**: 1044–1055.

**Tang, L.Y. and Sakamoto, W.** (2011). Tissue-specific organelle DNA degradation mediated by DPD1 exonuclease. *Plant Signal. Behav.* **6**: 1391–1393.

**Teixeira, R.M., Ferreira, M.A., Raimundo, G.A.S., Loriato, V.A.P., Reis, P.A.B., and Fontes, E.P.B.** (2019). Virus perception at the cell surface: revisiting the roles of receptor-like kinases as viral pattern recognition receptors. *Mol. Plant Pathol.* **20**: 1196–1202.

**de Torres Zabala, M. et al.** (2015). Chloroplasts play a central role in plant defence and are targeted by pathogen effectors. *Nat. Plants* **1**: 15074.

**Trapnell, C., Williams, B. a, Pertea, G., Mortazavi, A., Kwan, G., van Baren, M.J., Salzberg, S.L., Wold, B.J., and Pachter, L.** (2011). Transcript assembly and abundance estimation from RNA-Seq reveals thousands of new transcripts and switching among isoforms. *Nat. Biotechnol.* **28**.

**Udy, D.B., Belcher, S., Williams-Carrier, R., Gualberto, J.M., and Barkan, A.** (2012). Effects of Reduced Chloroplast Gene Copy Number on Chloroplast Gene Expression in Maize. *Plant Physiol.* **160**: 1420–1431.

**Wang, W., Vignani, R., Scali, M., and Cresti, M.** (2006). A universal and rapid



protocol for protein extraction from recalcitrant plant tissues for proteomic analysis. *Electrophoresis* **27**: 2782–2786.

**Wang, Y. et al.** (2021). A calmodulin-binding transcription factor links calcium signaling to antiviral RNAi defense in plants. *Cell Host Microbe* **29**: 1393-1406.e7.

**Wildermuth, M.C., Dewdney, J., Wu, G., and Ausubel, F.M.** (2001). Isochorismate synthase is required to synthesize salicylic acid for plant defence. *Nature* **414**: 562–565.

**Yamamoto, T., Mori, Y., Ishibashi, T., Uchiyama, Y., Ueda, T., Ando, T., Hashimoto, J., Kimura, S., and Sakaguchi, K.** (2005). Interaction between proliferating cell nuclear antigen (PCNA) and a DnaJ induced by DNA damage. *J. Plant Res.* **118**: 91–97.

**Yang, J.-Y., Iwasaki, M., Machida, C., Machida, Y., Zhou, X., and Chua, N.-H.** (2008).  $\beta$ C1, the pathogenicity factor of TYLCCNV, interacts with AS1 to alter leaf development and suppress selective jasmonic acid responses. *Genes Dev.* **22**: 2564–2577.

**Yanofsky, M.F., Porter, S.G., Young, C., Albright, L.M., Gordon, M.P., and Nester, E.W.** (1986). The *virD* operon of *Agrobacterium tumefaciens* encodes a site-specific endonuclease. *Cell* **47**: 471–477.

**Yao, Y., Bilichak, A., Golubov, A., and Kovalchuk, I.** (2011). Local infection with oilseed rape mosaic virus promotes genetic rearrangements in systemic *Arabidopsis* tissue. *Mutat. Res. Mol. Mech. Mutagen.* **709–710**: 7–14.

**Zhao, P. et al.** (2021). Red-light is an environmental effector for mutualism between begomovirus and its vector whitefly. *PLOS Pathog.* **17**: e1008770.

**Zorzatto, C. et al.** (2015). NIK1-mediated translation suppression functions as a plant antiviral immunity mechanism. *Nature* **520**: 679–682.

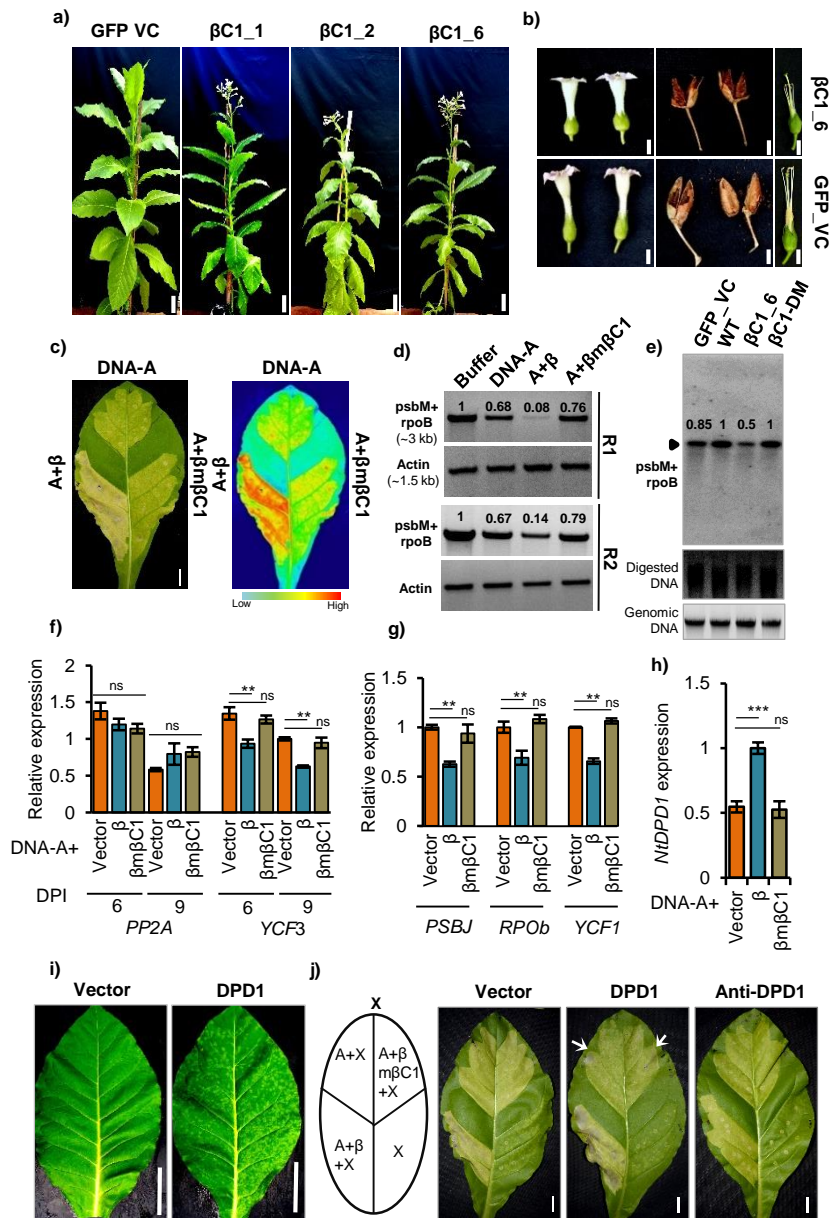

**Figure 1:  $\beta C1$  selectively degrades chloroplast DNA.** **a)** Phenotype of transgenic *N. tabacum* lines over-expressing  $\beta C1$ . Pictures taken at 50 days post transplantation (DPT). N=3 for each transgenic lines **b)** Pictures of flower and seedpod. **c)** *N. tabacum* leaves showing chlorosis when infected with DNA-A, DNA-A+ $\beta$  and DNA-A+ $\beta m\beta C1$  (left). Heat map representing the extent of chlorosis (right) **d)** Semi-quantitative DNA PCR showing abundance and integrity of chloroplast (*psbM+rpoB*) or nuclear (*actin*) genome upon infection with  $\beta$  or  $\beta m\beta C1$ . **e)** Southern blot (SB) showing the abundance of chloroplastic genome in  $\beta C1$  OE plants. A 3-kb (*psbM+rpoB*) chloroplastic region was used as probe. Genomic DNA panel represents a duplicate gel with same amount of DNA used in SB for normalization. **f)** DNA qPCR representing the abundance of chloroplastic (*YCF3*) or nuclear (*PP2A*) genes upon infection with  $\beta$  or  $\beta m\beta C1$ . Nuclear *ACTIN* was used for normalization. **g)** Same as **f)** except 9 DPI sample, with other plastid genes. **h)** Expression of *DPD1* nuclease in virus infected samples with  $\beta C1$  and  $m\beta C1$ . **i)** Phenotype of the systemic leaf expressing *NiDPD1* (PVX-*NiDPD1*). 25 DPI. N=4, image linked with figure S2. **j)** Chlorosis and necrotic phenotypes of *N. tabacum* leaves infected with DNA-A, DNA-A+ $\beta$  or  $\beta m\beta C1$  co-infiltrated with PVX vector (left panel), P-*DPD1* (middle panel) or P-*anti-DPD1* (right panel). White arrow highlights new necrotic spots. Biologically replicated twice. Scale bar 2 cm. N-terminal GFP tagged  $\beta C1$  was used for making transgenic  $\beta C1$  lines. Size bar in **a)** and **b)** corresponds to 5.8, and 1 cm. Size bar in **c)**, **i)** and **j)** is 1.2 cm. GFP VC is GFP over-expressing vector control plant. Tukey's multiple comparison test with three stars representing P-value,  $P \leq 0.001$  and two stars  $P \leq 0.01$ . n=4.

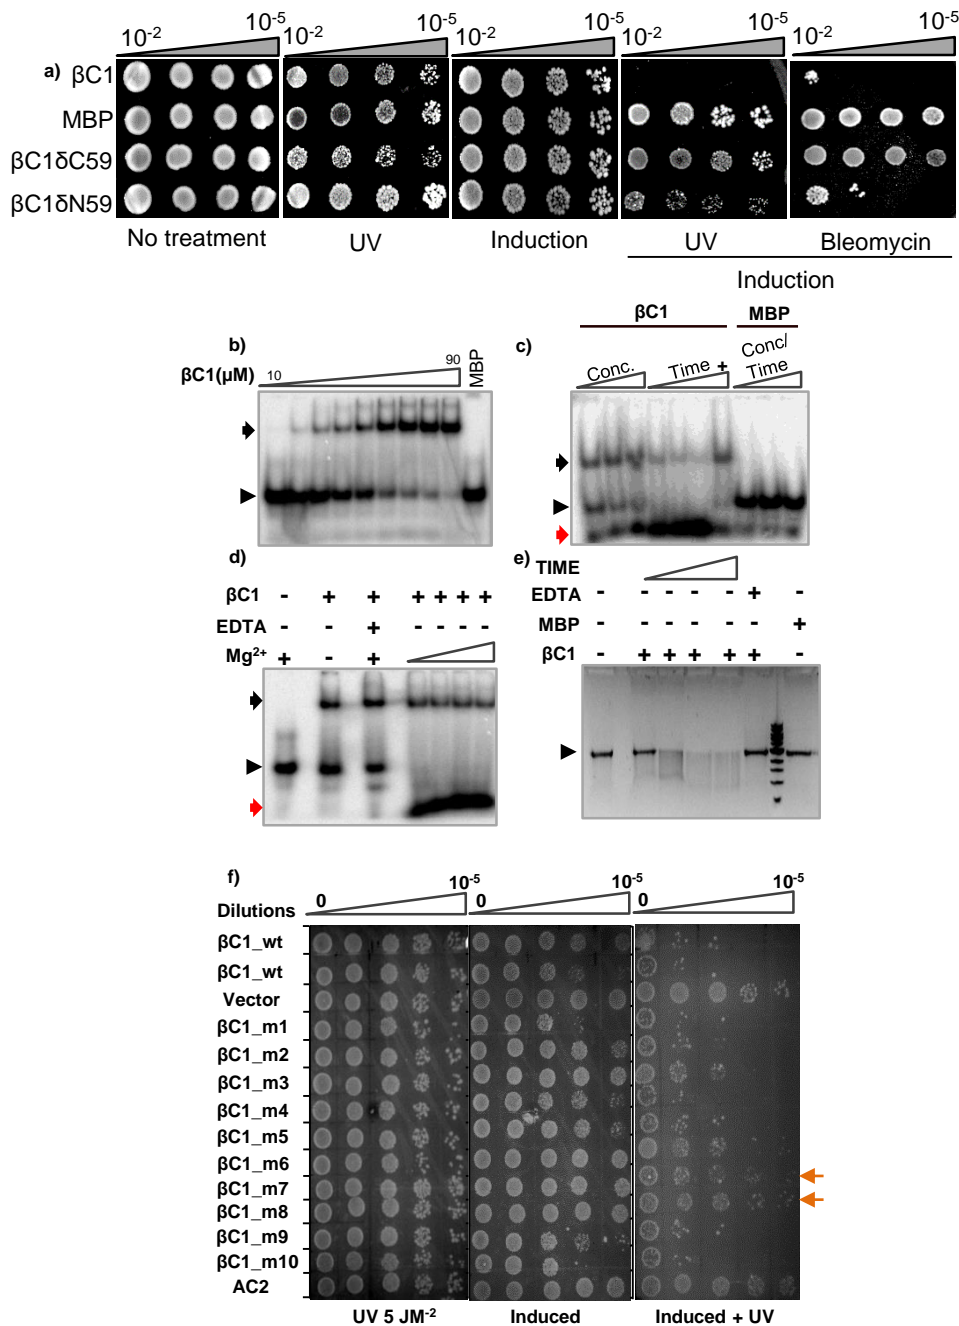

**Figure 2: SyYVCV  $\beta C1$  displays genotoxicity in *E.coli* and associated nuclease activity *in-vitro*.** a) DNA damage sensitivity assay:  $\beta C1$  was transformed in Rosetta Gammi DE3 cells and grown till mid lag phase followed by spotting on LB agar with sub-lethal UV:  $5 J/m^2$ , 254 nm. Bleomycin  $1 \mu g/ml$ . b) EMSA showing binding of  $\beta C1$  with ssDNA in a 8% native PAGE gel. Triangle indicates increasing concentration of  $\beta C1$ . c) Nuclease assay:  $\beta C1$  was incubated with ssDNA in various concentrations for varying duration followed by EMSA in a 6% native PAGE gel. (+) indicates addition of 1 mM EDTA. d) Cation dependency assay:  $Mg^{2+}$  (1 to 5 mM) or EDTA (5 mM) was co-incubated with  $\beta C1$  and ssDNA followed by EMSA on a 6% native PAGE gel. e) Endonuclease activity assay:  $\beta C1$  was incubated (1 to 4 h) with covalently closed circular ssDNA ( $\phi 174$ ) followed by visualization on 1% agarose gel. f) Genotoxicity assay:  $\beta C1$  and mutants were spotted on plates in various dilutions and treatments. Induced represents induction of gene with 0.1 mM IPTG, UV is UV-C (254 nm). All assay results were replicated multiple times. Vector expresses MBP. Additional info: N-terminal MBP tagged  $\beta C1$  (*E. coli* purified, SEC, DEAE) was used in all biochemical assays. MBP parallelly processed with  $\beta C1$  was used as control. ssDNA substrate used was 49-nt long (150 pg). ssDNA was labelled at 5' using  $^{32}P$ . Black and red arrows indicate bound and degraded fraction of ssDNA, respectively. Black triangle - unbound substrate.

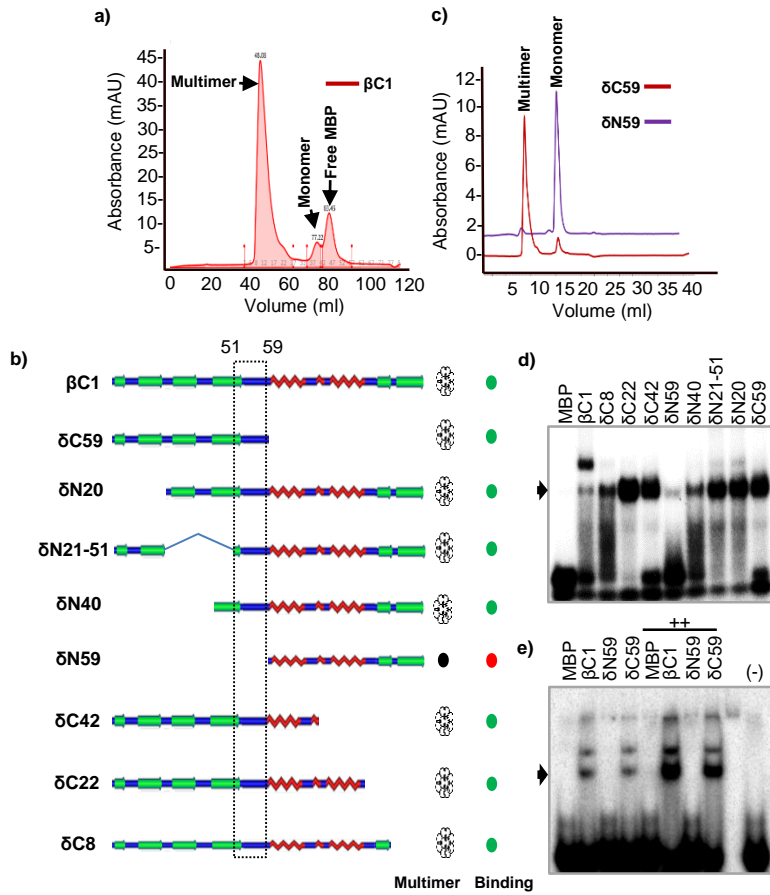

**Figure 3: Demarcation of multimerization domain of  $\beta C1$ .** **a)** Size exclusion profile of MBP- $\beta C1$  on a SD200 preparative column highlighting multimer, monomer and free MBP in  $\beta C1$  fractions. **b)** Schematics of  $\beta C1$  truncation mutants showing a summary of size exclusion analysis in a SD200 sephadex analytical column. Right side columns depict multimerization and DNA binding state of respective protein. Green and red circles indicate presence or absence of DNA binding, respectively. **c)** Overlaid size exclusion profile of C-terminal ( $\delta N59$ ) and N-terminal ( $\delta C59$ ) truncation mutants of  $\beta C1$  analysed on an SD200 analytical column. **d)** EMSA showing ssDNA binding of  $\beta C1$  and its truncation mutants. **e)** Same as d) except N and C terminal truncation mutants were used. ++ indicates 2-fold increase in protein and (-) indicates no protein control. Black arrow indicates binding.

a)

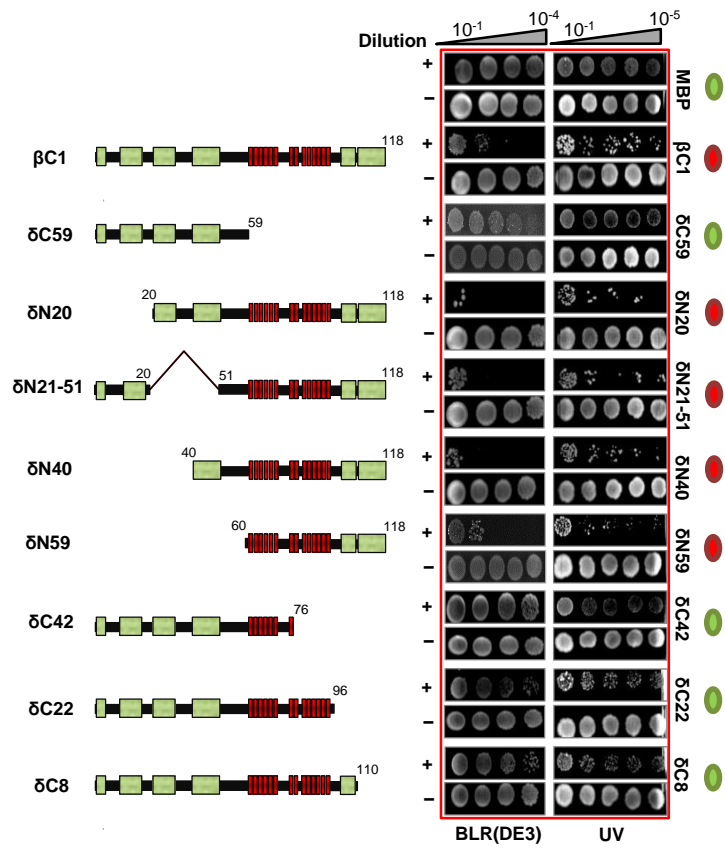

b)

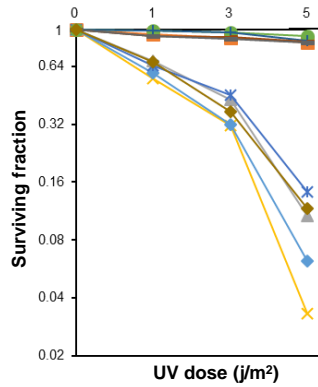

c)

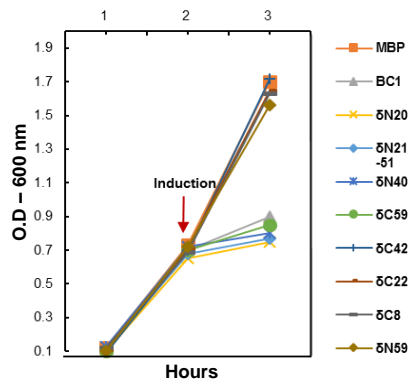

**Figure 4: SyYVCV βC1 C-terminal end is required for genotoxicity.** a) Schematic diagram of βC1 mutants (left panel). βC1 and its mutants were transformed in BLR (DE3) cells and induced with IPTG (middle panel). Right panel: βC1 was expressed in Rosetta Gammi cells followed by spotting and exposure to UV-C. b) and c) Plots showing survival rate and growth after c) UV treatment and d) induction of βC1 in BLR cells (0.2 mM). Green and red circles represent majority fraction of cells being alive or dead.



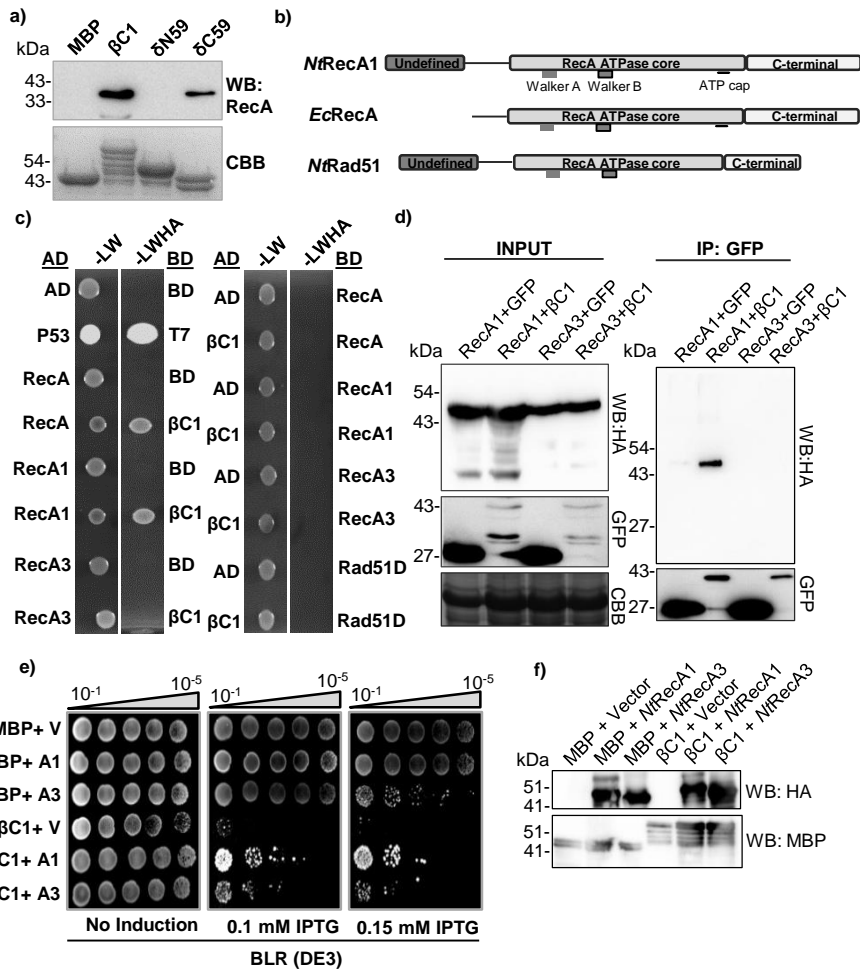

**Figure 5: *NtRecA1* interacts with SyYVCV  $\beta$ C1.** **a)** WB of recombinantly purified  $\beta$ C1 with anti-RecA showing the presence of EcRecA in purified  $\beta$ C1 fractions, n=3. **b)** Domain architecture of RecA and its plant homologs. **c)** Y2H assay showing interaction of  $\beta$ C1 with RecA and its plant homologs. Dilution showed is  $10^{-2}$ . The assay was performed with different dilutions and knockout media, representative image shown. **d)** *in planta* pull-down assay to check interaction of  $\beta$ C1 with RecA homologs. RecA homologs were tagged with HA and  $\beta$ C1 was tagged with GFP. GFP was taken as control. **e)** Complementation of *NtRecA1* and *NtRecA3* in MBP or  $\beta$ C1 expressing BLR (DE3) (*recA*<sup>-</sup>) cells. **f)** WB confirmation of complementation experiment. RecA1 and RecA3 were tagged with HA and  $\beta$ C1 with MBP. RecA1 and RecA3 protein size: ~45 kDa,  $\beta$ C1: ~59 kDa, MBP: ~42 kDa.

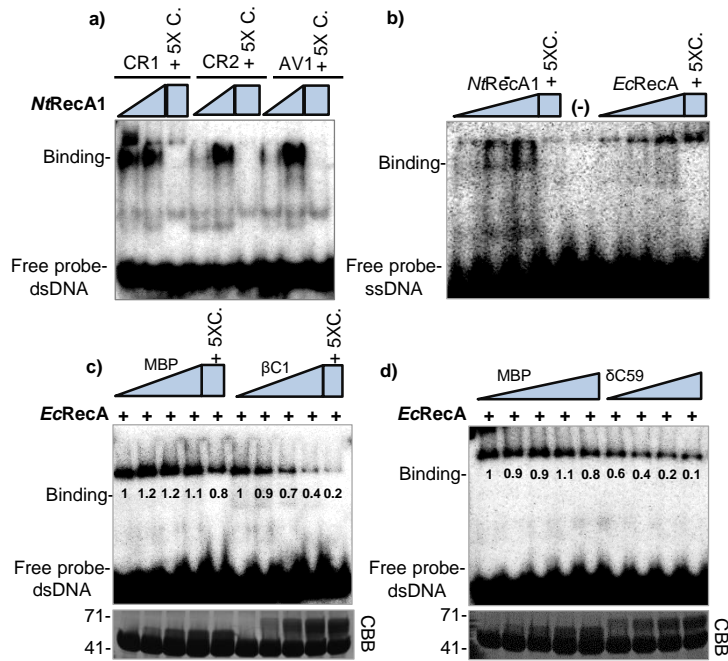

**Figure 6: βC1 modulates DNA binding property of RecA.** a) Gel shift assay showing interaction of *NtRecA1* with dsDNA probes. b) Same as a) except ssDNA probes. c) and d) EMSA competition assay: RecA protein was co-incubated with viral DNA probe along with varied concentrations of MBP-βC1, βC1 truncation mutant or MBP alone, before resolving. CBB shows amount of total protein. 5X represents concentration of competitive inhibitor (cold probe). MBP-βC1: 59 kDa, MBP: 42 kDa, RecA: 38 kDa.

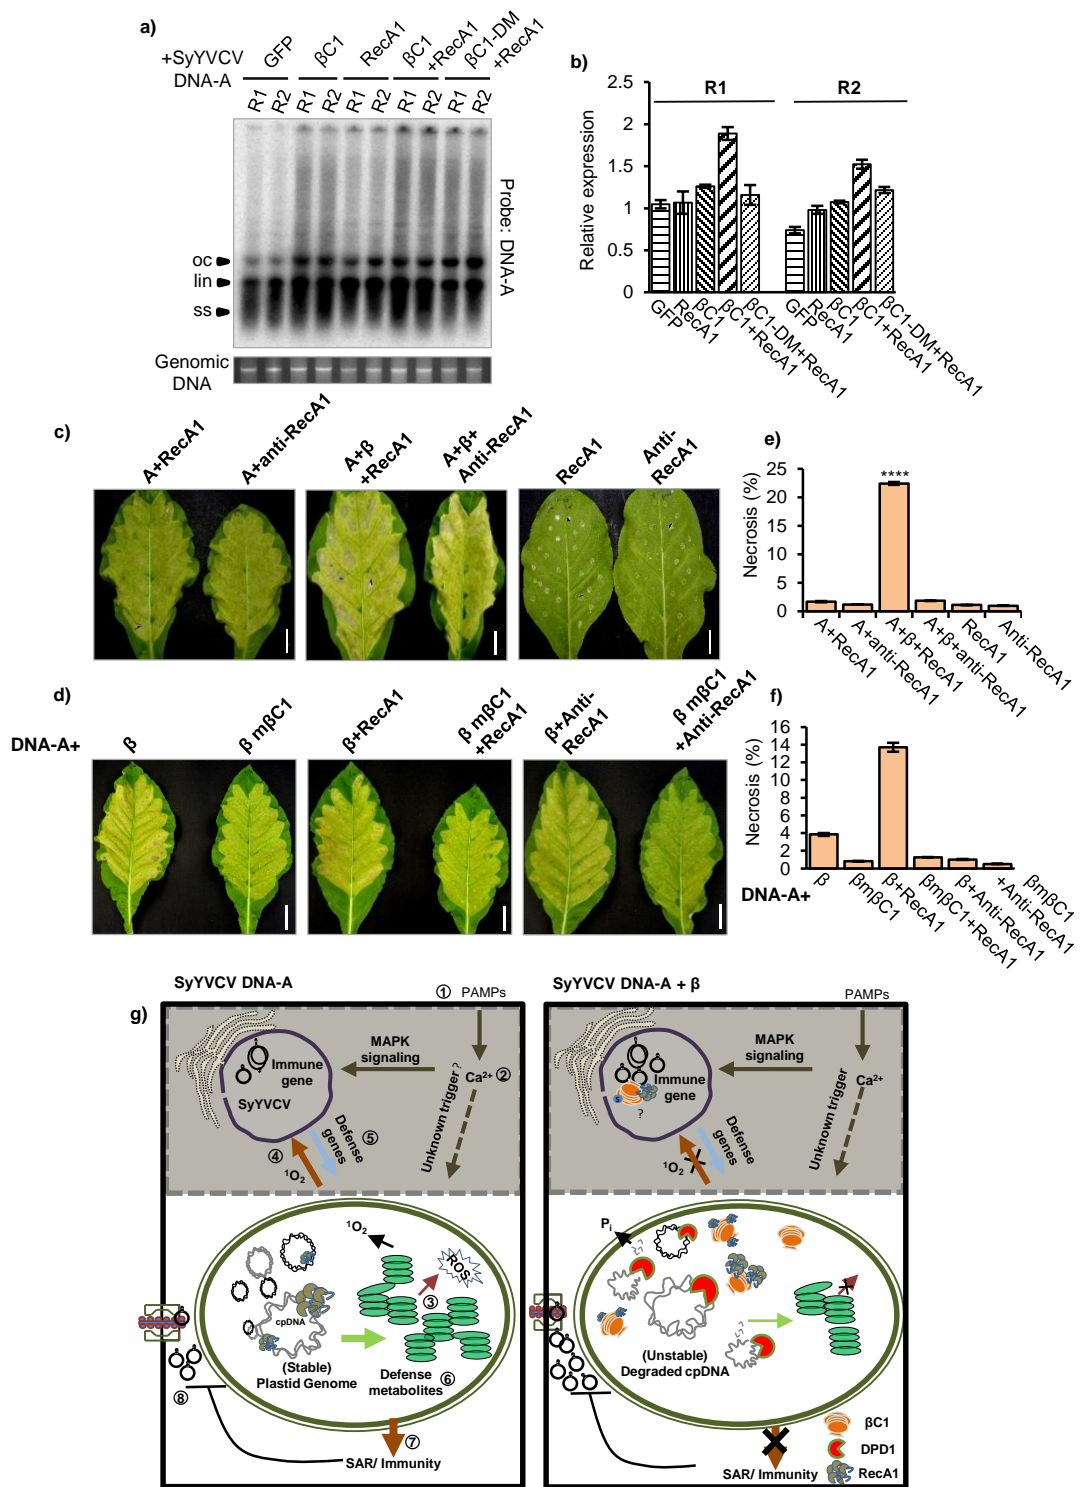

**Figure 7: RecA1 augments pathogenicity determinant function of  $\beta$ C1.** **a)** Viral replication assay with SyYVCV DNA-A partial dimer co-inoculated with *NtRecA1*,  $\beta$ C1 or both, in *N. benthamiana*. SB blot was performed at 7DPI using full length DNA-A as probe. **b)** Same as a) except qPCR of viral Rep. *Actin* was used as internal control. R indicates biological replicates. **c)** RecA1 or anti-RecA1 infiltrated either alone or with DNA-A and DNA-A+ $\beta$  in *N. tabacum* leaves. N=3. **d)** Same as a) except DNA- $\beta$ m $\beta$ C1 was co-infiltrated along with RecA1 and anti-RecA1. **e)** and **f)** Quantification of the necrosis observed in infected leaves in a) and b), respectively. Quantification of necrotic area was done using FIJI. Scale bars in leaf is 2 cm. Images were taken at 12 DPI. **g)** **Summary: Left panel** (SyYVCV DNA-A) RecA1 maintains the multicopy plastid genome. 1) During virus infection, PRRs detects PAMPs. 2) Activated PRRs, phosphorylate special  $\text{Ca}^{2+}$  channels leading to calcium influx. 3) The  $\text{Ca}^{2+}$  signal is relayed to chloroplast causing release of  $\text{Ca}^{2+}$  from thylakoids into the stroma. 4) Increased stromal  $\text{Ca}^{2+}$  leads to the increase in  $^1\text{O}_2$  which are the key molecules for retrograde signaling between nucleus and chloroplast. 5)  $^1\text{O}_2$  activates the transcription and translocation of nuclear defense responsive genes into the chloroplast. 6) Increased synthesis of hormones and secondary metabolite 7) These secondary metabolites travel through the plants inducing resistance and countering pathogenic invasion of new cells. 8) Intracellular viral movement is severely curtailed due to plastid mediated defense reducing symptom severity and disease. **Right panel:** In the presence of SyYVCV  $\beta$ C1, plastid genome maintainer RecA1 is recruited and forms a complex with  $\beta$ C1. Simultaneously,  $\beta$ C1 upregulates plastid nucleases like DPD1 to destabilize plastid genome, reducing the photosynthetic output and capability to code for key enzymes. In the presence of  $\beta$ C1, significantly reduced copy number of plastid genome severely hampers the retrograde signaling necessary for defense gene activation and immunity. Disruption of chloroplast defense signaling by  $\beta$ C1 cripples SAR and assists in viral infection.

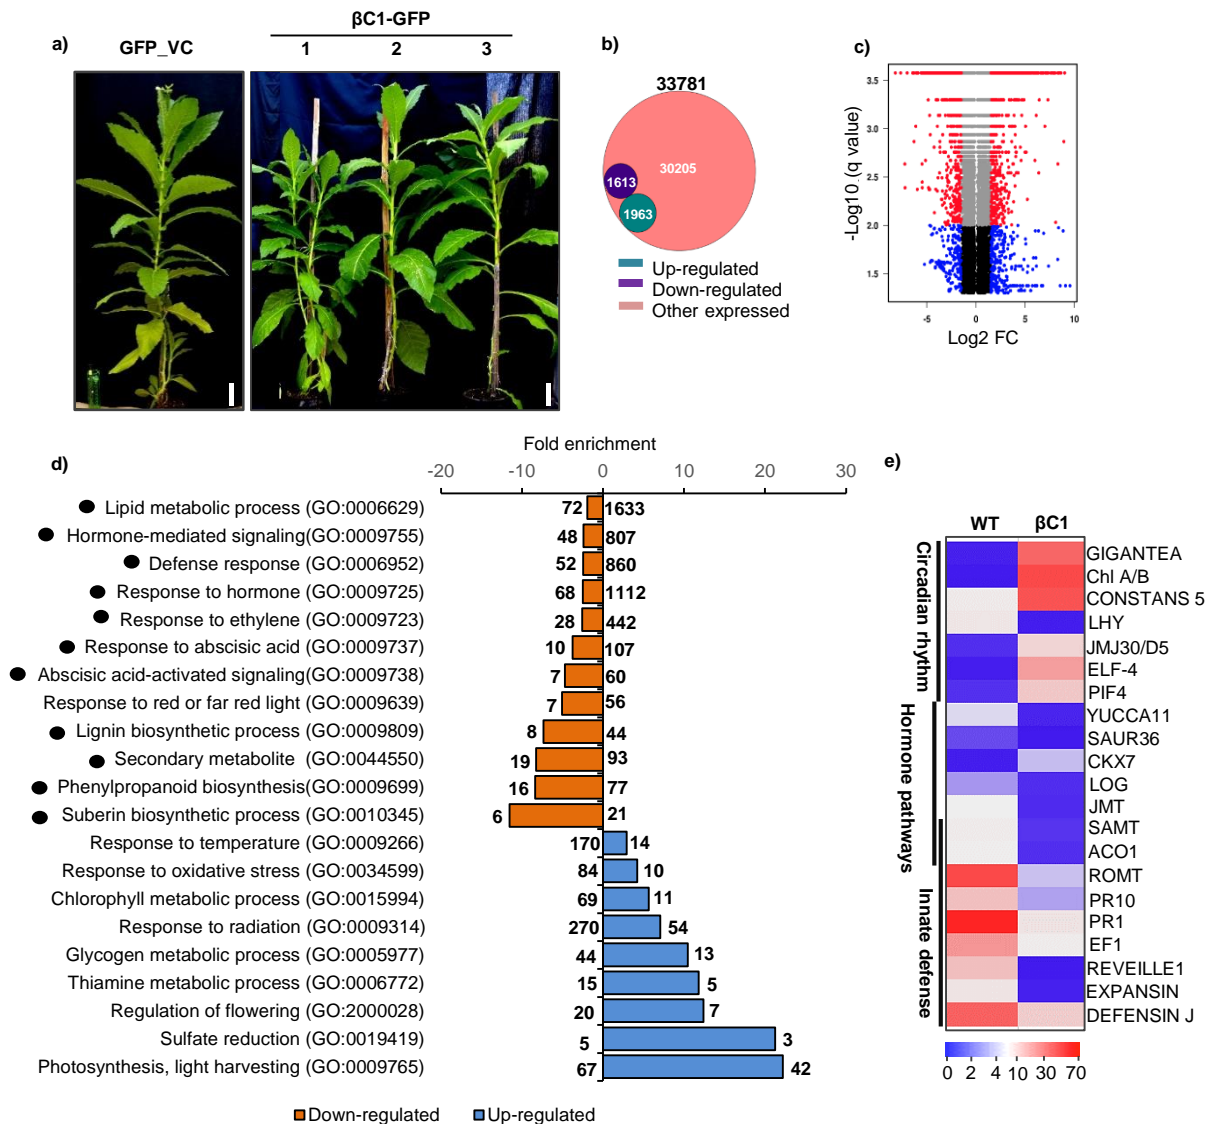

**Figure S1: Signalling pathways are deregulated in  $\beta$ C1 transgenic lines.** **a)** *N. tabacum* transgenic plants over-expressing C-terminal GFP tagged  $\beta$ C1 showing similar lack of phenotype to vector plants as reported in previous studies (Cheng et al., 2011). n=2 for each transgenic line. **b)** Venn schematic showing the number of DE loci in  $\beta$ C1-OE plants. **c)** Volcano plot showing DE loci in  $\beta$ C1-OE plants. **d)** DE loci of  $\beta$ C1 transgenic line ( $\beta$ C1\_6) characterized under representative GO (Gene Ontology) classification. Numbers inside the bar graph represents enriched DE loci and numbers on top of respective bars indicate total number of reference loci in each process. Black circle represents defense pathway processes. **e)** Heat map showing normalised FPKM values of major pathway genes in  $\beta$ C1 plant versus vector control plants. Size bar in a) is 5.8 cm.

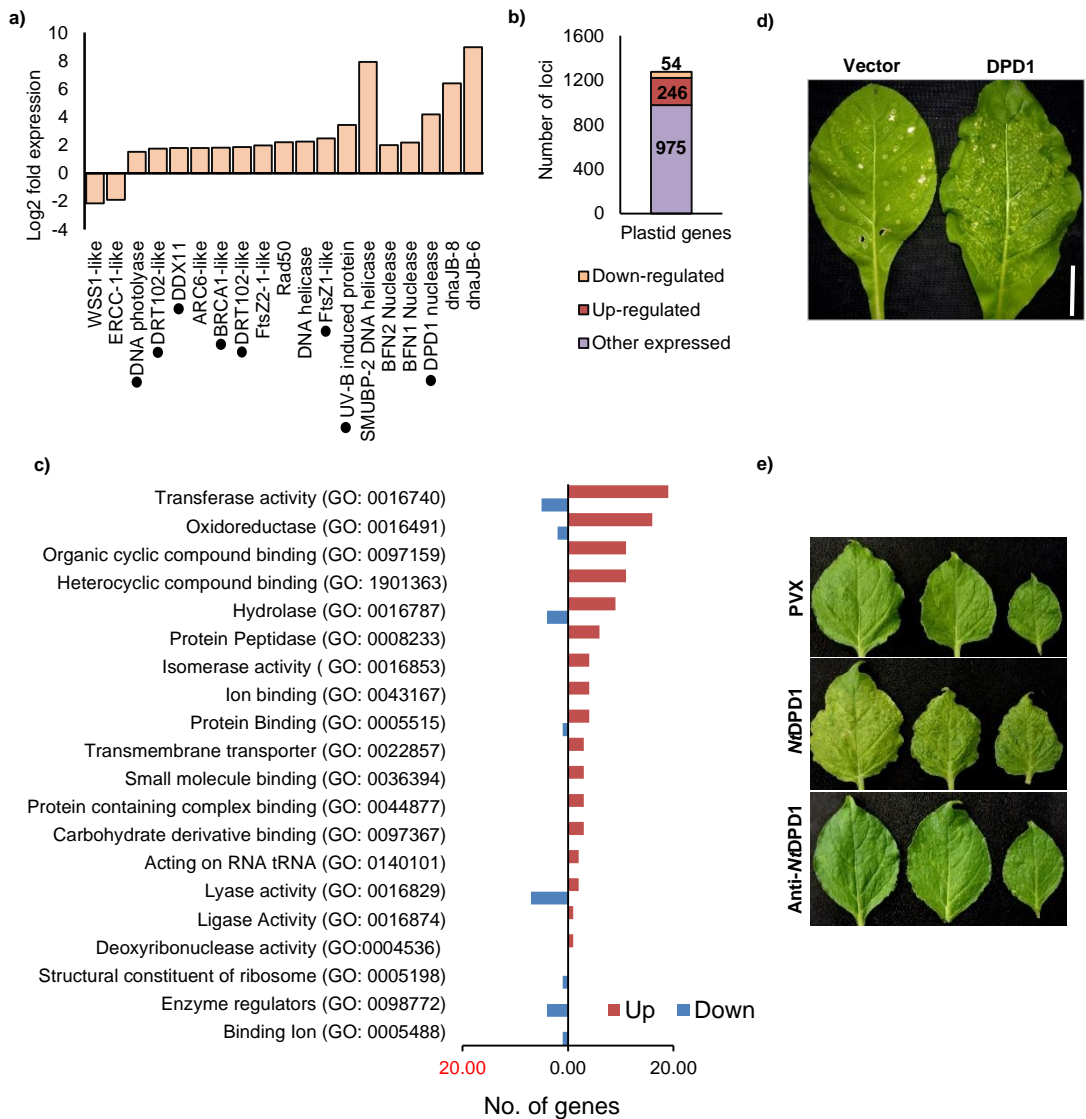

**Figure S2: Plastid localised genes are significantly misexpressed in  $\beta$ C1-OE lines.** **a)** DE of important DDR pathway genes in  $\beta$ C1 transgenic lines. **b)** Plot showing DE loci coded by chloroplast genome in  $\beta$ C1-OE plants. **c)** DE loci characterized under representative GO (Gene Ontology) processes for chloroplastic genome of  $\beta$ C1-OE plants. **c)** Black circle represents known chloroplast localization status. **d)** Phenotype of the *N. tabacum* leaf infected with PVX-*NtDPD1* or PVX. 8 DPI, local leaf, n=4 plants. **e)** Same as d) except *N. benthamiana* plants were infected with PVX-*NtDPD1*, PVX-Anti-*NtDPD1* and PVX. 8 DPI, systemic leaves, n=5 plants. Black circle represents known chloroplast localization.



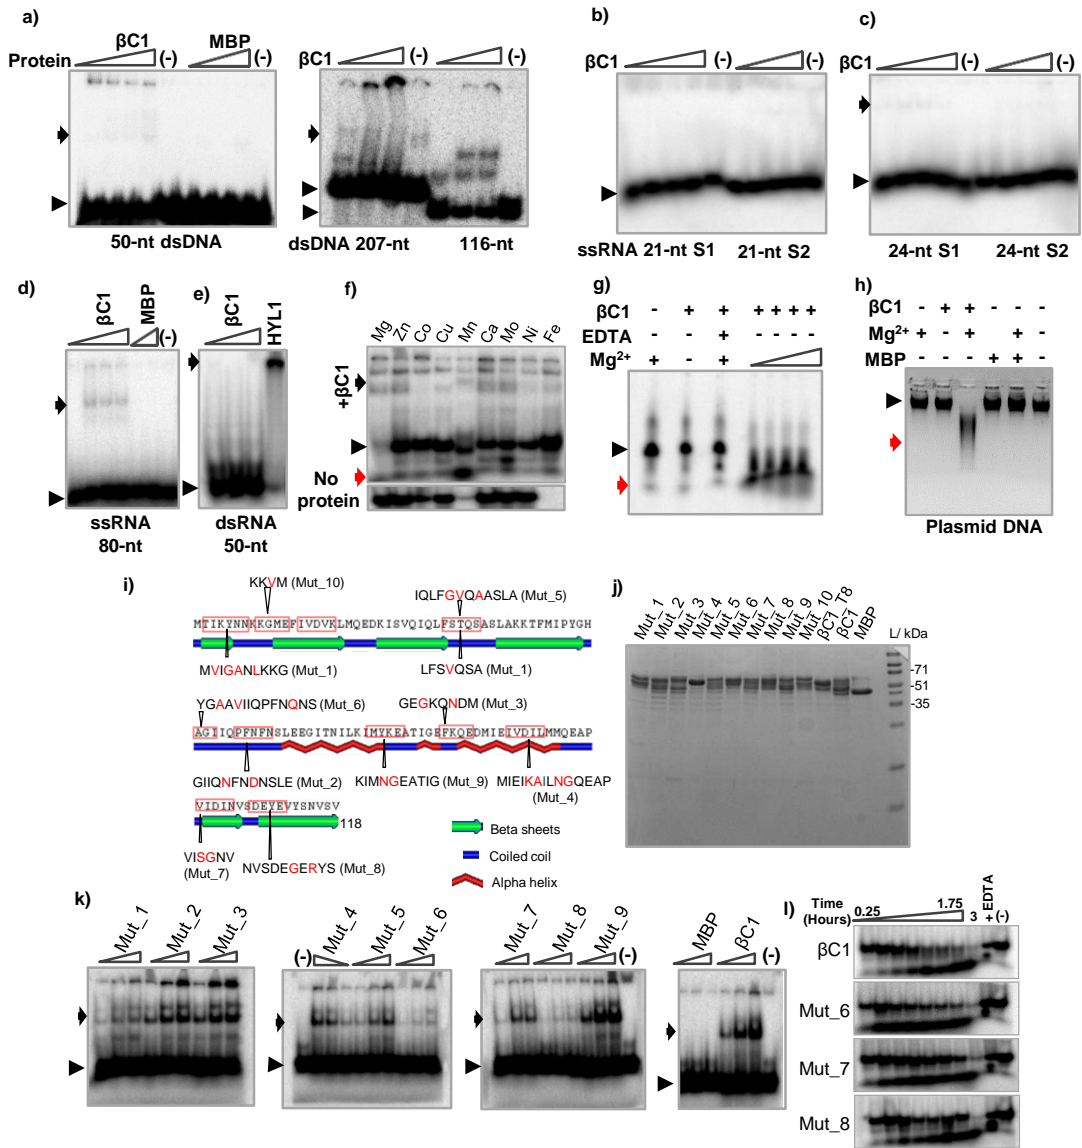

**Figure S3:  $\beta$ C1 binds preferably to ssDNA *in vitro*.** **a)** Binding of  $\beta$ C1 to dsDNA. **b)** EMSA of  $\beta$ C1 with ssRNA (21-nt). S1 and S2 are two different probes. **c)** same as b) except using 24-nt ssRNA. **d)** EMSA of  $\beta$ C1 with long ssRNA (80-nt). **e)** EMSA of  $\beta$ C1 to dsRNA (50-nt). **f)** Co-factor dependency. Various cations (1 mM) were incubated with  $\beta$ C1 to analyze the effect on ssDNA degradation.  $Mn^{2+}$  and  $Fe^{2+}$  precipitated the DNA in no protein control. **g)**  $Mg^{2+}$  dependency of ssDNA nuclease activity associated with purified MBP- $\beta$ C1, denaturing PAGE. **h)** Nuclease assay with 12-Kb plasmid DNA. **i)** Schematic representation of SyYVCV  $\beta$ C1 showing scheme for point mutations. Residues indicated in red are substituted in mutants **j)** CBB gel showing recombinantly purified  $\beta$ C1 mutants depicted in i). **k)** *in vitro* binding assay: gel showing binding affinity of  $\beta$ C1 mutants towards 49-nt ssDNA (with EDTA, no  $Mg^{2+}$ ). **l)** Time point nuclease assay: mutant 6, 7 and 8 was incubated with ssDNA in nuclease buffer containing  $Mg^{2+}$ . All the binding experiments were repeated multiple times with  $\beta$ C1 and mutants proteins extracted in biological replicates. A representative image of the binding experiment is shown here. (-) indicates no protein. Other details are same as figure 2.

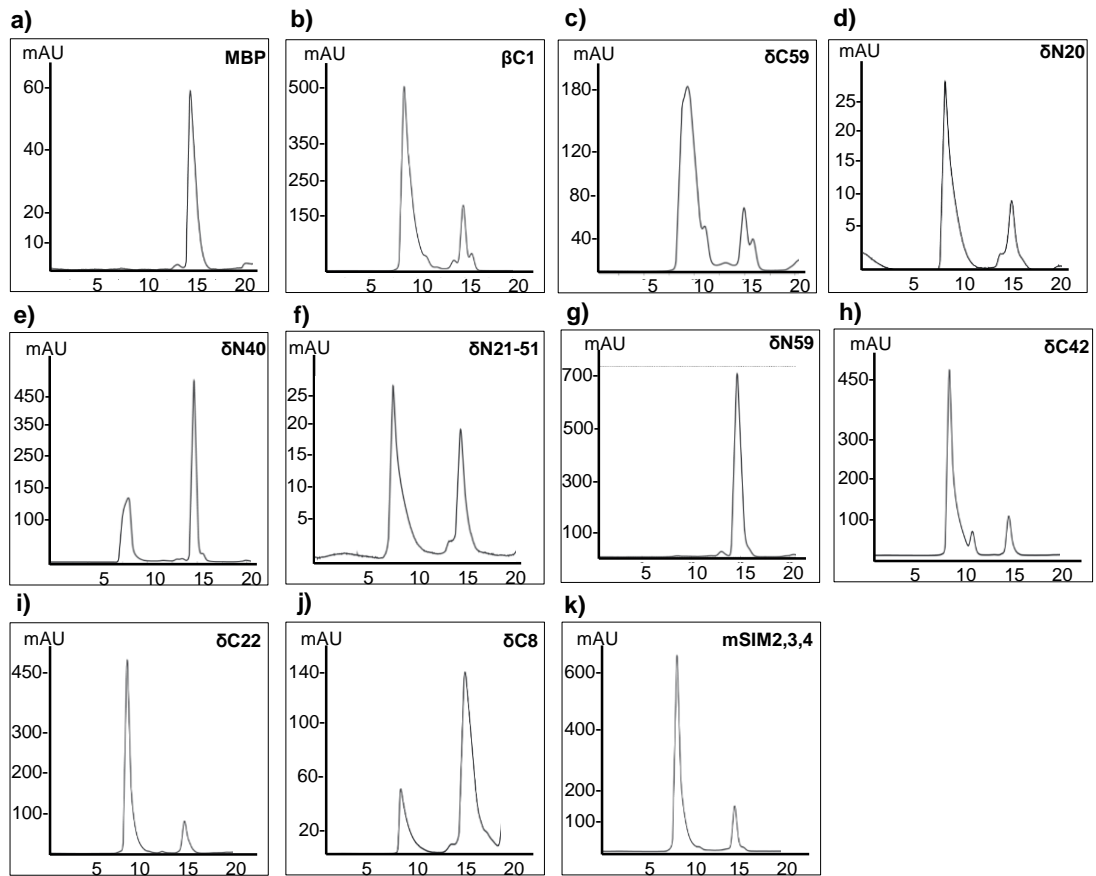

**I)**

| Protein (MBP tagged) | Exp. Mol. Wt. | Multimer Peak (ml) | Monomer/Cleaved protein Peak (ml) |
|----------------------|---------------|--------------------|-----------------------------------|
| MBP                  | 47.3          | –                  | 14.50                             |
| βC1                  | 59.9          | 8.66               | 14.85                             |
| δC59                 | 53.1          | 8.42               | 14.64                             |
| δN20                 | 57.5          | 8.40               | 15.03                             |
| δN40                 | 55.3          | 8.09               | 14.67                             |
| δN21-51              | 56.5          | 8.37               | 15.03                             |
| δN59                 | 53.2          | –                  | 14.45                             |
| δC42                 | 55.3          | 8.68               | 14.94                             |
| δC22                 | 57.4          | 8.64               | 14.94                             |
| δC8                  | 58.6          | 8.44               | 15.71                             |
| mSIM2,3,4            | 59.9          | 8.58               | 14.88                             |

**Figure S4: Size exclusion profile of βC1 and its truncation mutants.** a) to k) SD-200 Superdex 10/300 GL analytical columns were used for the assay. All proteins were MBP tagged. a) MBP, b) βC1, c) δC59, d) δN20, e) δN40, f) δN21-51, g) δN59, h) δC42, i) δC22, j) δC8, k) mβC1 (mSIM2,3,4). **I)** Table indicating elution volume of each peak for individual proteins. All the assays were biologically replicated multiple times in SD200 as well as SD75 Superdex column. N=3, biological replicates (separate protein batches) on SD-75 columns.

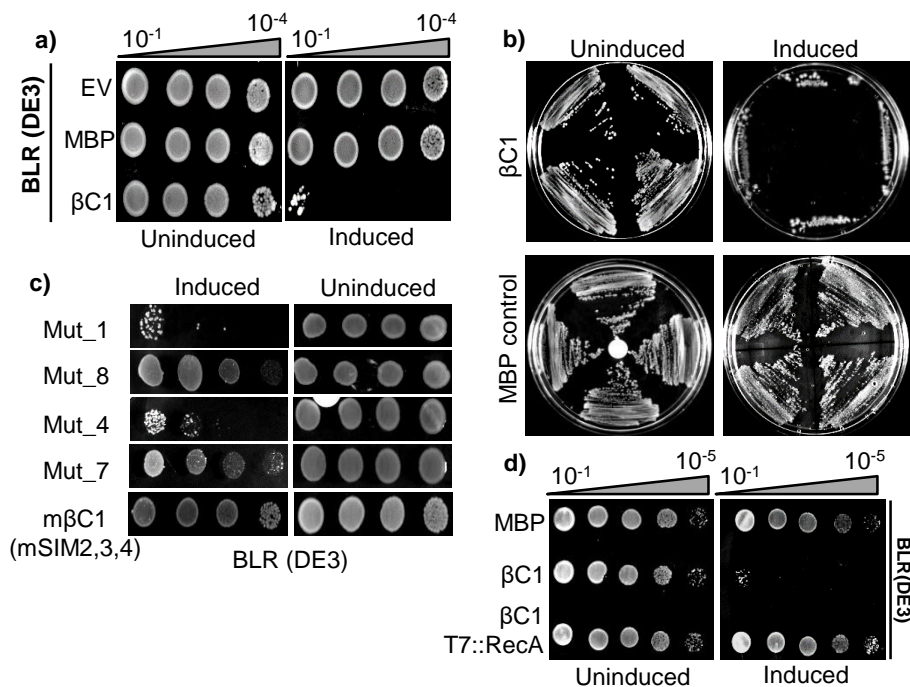

**Figure S5: Plant *RecA*, a *Rad51* homolog, is essential for cell survival in presence of  $\beta C1$ .** a) DNA damage sensitivity assay:  $\beta C1$  was expressed in BLR (DE3) cells (*RecA* deficient) followed by induction with 0.1 mM IPTG. b) Same as a) but streak assay. c) Growth assay of BLR (DE3) cells expressing different mutants of  $\beta C1$ . d) Same as b), but with *Caulobacter RecA* (*CvRecA*) complemented in BLR (DE3) cells co-expressing  $\beta C1$ . EV indicates empty vector. All the assays were biologically replicated at least 3 times.

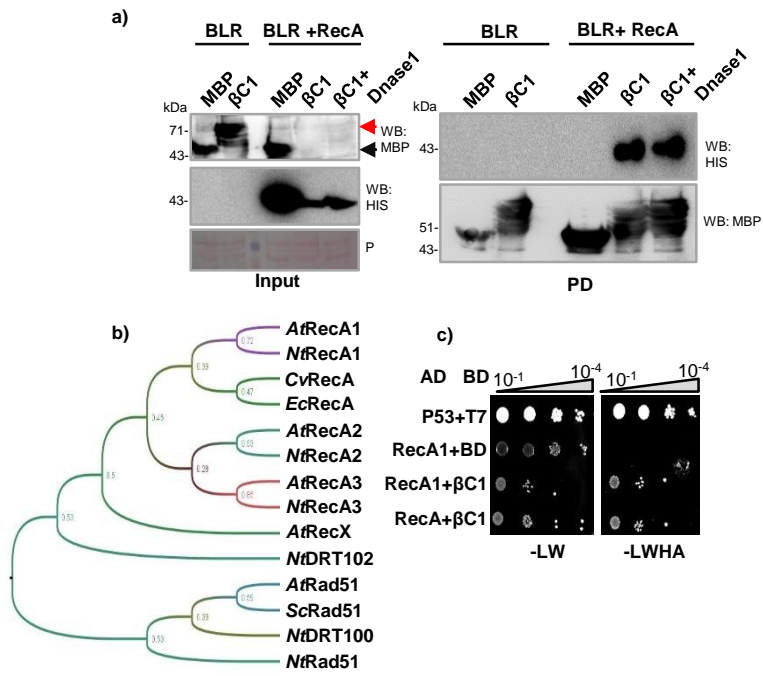

**Figure S6: RecA directly interacts with SyYVCV  $\beta$ C1.** **a)** *in vitro* pull-down assay with 6X-HIS-RecA and MBP- $\beta$ C1. **b)** Maximum likelihood (ML) tree of RecA homologs based on core ATPase region. Numbers indicate bootstrap values on nodes. **c)** Y2H assay showing interaction of  $\beta$ C1 with RecA and its plant homolog.

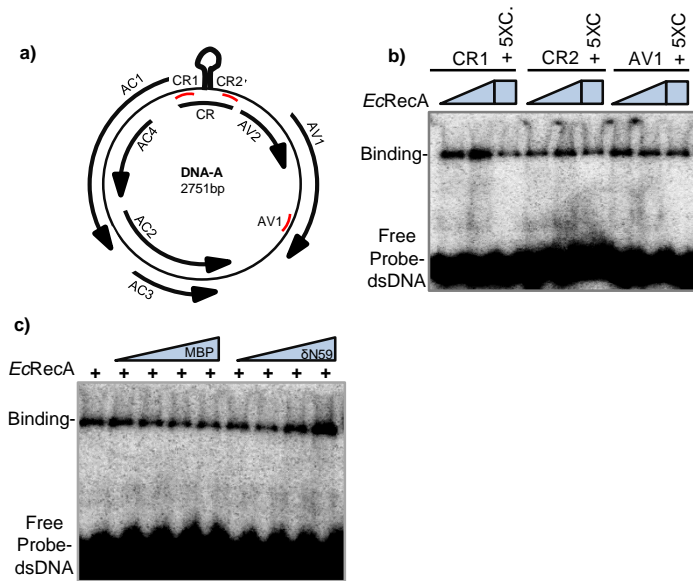

**Figure S7: NtRecA1 binds to DNA.** **a)** Schematic diagram showing SyYVCV genome architecture. Curved black arrow indicates ORFs and direction. Red line represents the region used to design probes. **b)** Interaction of *EcRecA* with viral dsDNA probes. **c)** EMSA competition assay: RecA protein was co-incubated with viral DNA probe along with varied concentration of  $\beta C1$  truncation mutant or MBP alone before resolving. 5XC indicates concentration of competitor (cold probe).

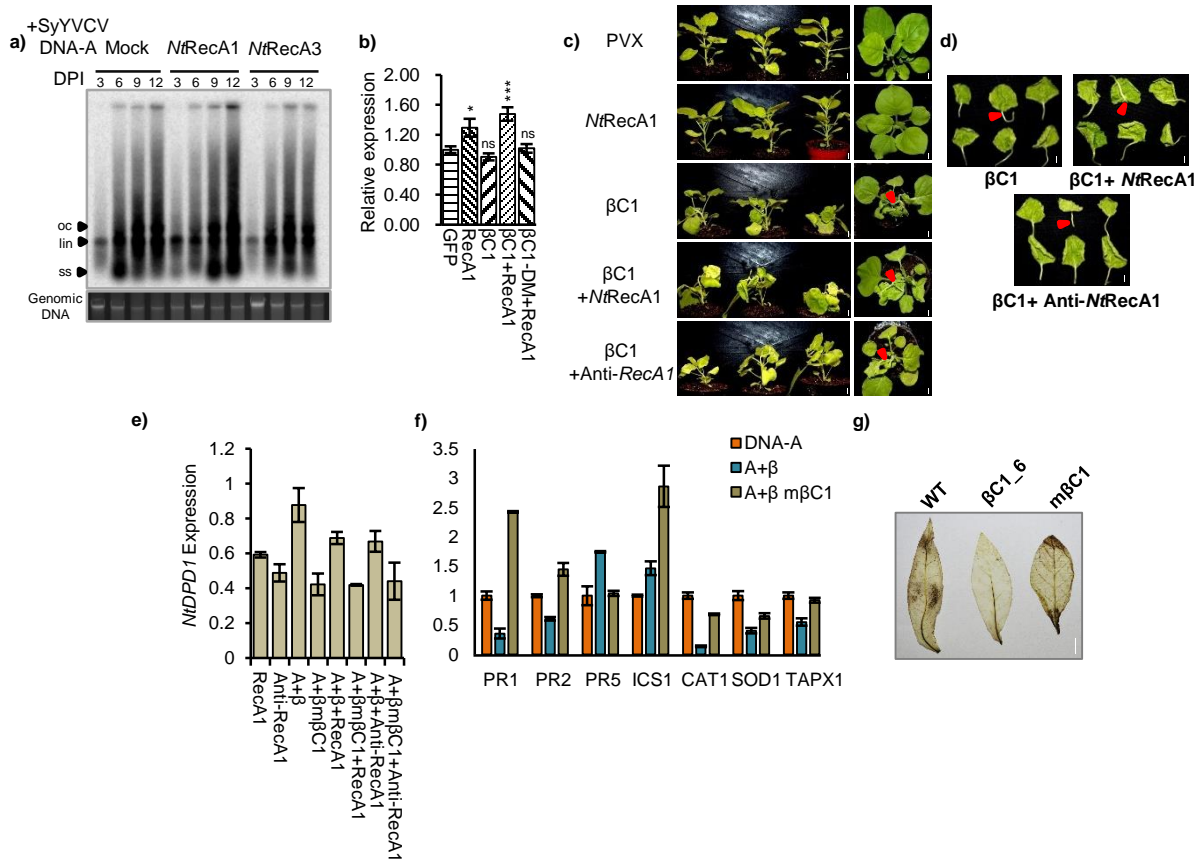

**Figure S8: RecA1 enhances viral replication in the presence of  $\beta$ C1.** **a)** Viral replication assay with SyYVCV DNA-A partial dimer co-inoculated with RecA1 or RecA3 in *N. tabacum*. SB blot was performed using full length DNA-A as probe. **b)** qPCR for viral titre analysis in *N. tabacum* infected with SyYVCV DNA-A in combination with  $\beta$ C1 or  $\beta$ C1-DM along with RecA1. **c)** RecA1 augments symptom determination function of  $\beta$ C1. Genes were expressed in PVX based vectors to analyse symptoms, either alone or in combinations. Images were taken at 12 DPI. *NtRecA1* or anti-*NtRecA1* expressed from PVX vector alone or in combination. **d)** Similar to c) except  $\beta$ C1 was used in combination with *NtRecA1* or anti-*NtRecA1*. Petiole was detached in each case. Red arrow indicates petiole angle. Scale bar 0.5 cm. **e)** Transcript expression of *DPD1* during infection with various combinations. **f)** Transcript level of various PR and defense genes during infection with SyYVCV carrying WT  $\beta$ C1 or m $\beta$ C1. **g)** DAB staining showing accumulation of ROS in  $\beta$ C1 and m $\beta$ C1. Two week old tissue culture maintained transgenic plants were used for staining. Tukey's multiple comparison test with three stars representing P-value,  $P \leq 0.001$  and two stars  $P \leq 0.01$ . n=4.



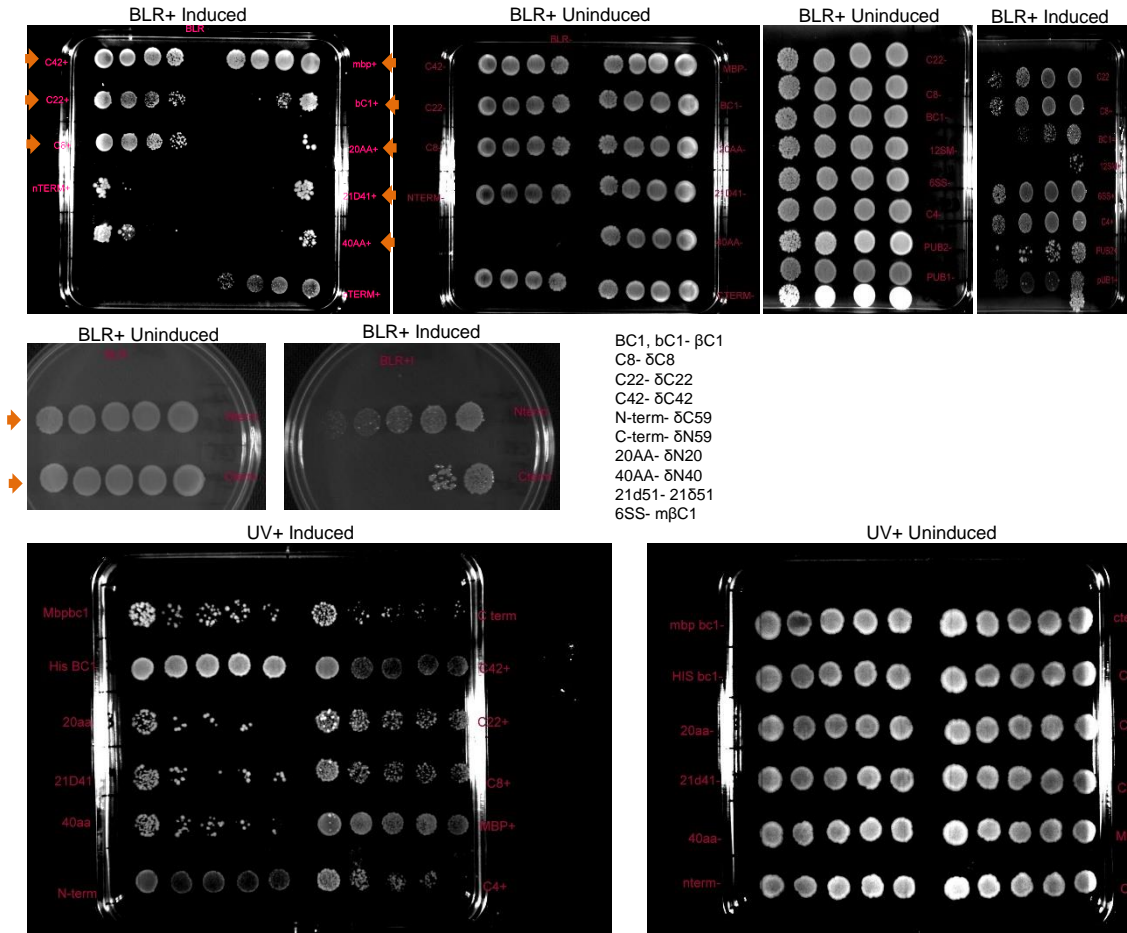

Uncropped plate images used in figure 3. Arrow indicate used. Section for BLR. All were used from UV.

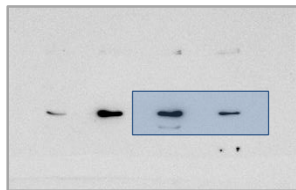

Figure 5A.

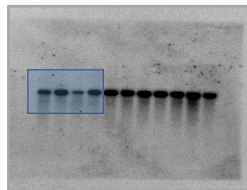

Figure 1E

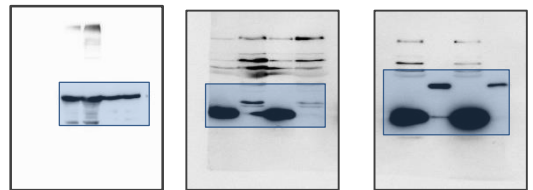

Figure 5D.

Figure S9: Full images of cropped blots and plates.

**Table S1:** Mass-spectrometry identified interacting proteins in *E.coli* purified  $\beta$ C1

| Accession  | Description            | Coverage [%] | Peptides | PSMs | Unique Peptides | Score Sequest HT: |
|------------|------------------------|--------------|----------|------|-----------------|-------------------|
| A0A0H2Z1Z1 | Protein RecA           | 59           | 18       | 59   | 17              | 165.63            |
| A0A069XJD6 | Chaperone DnaK         | 84           | 66       | 412  | 38              | 1366.38           |
| A0A0A0F6U9 | Chaperone DnaJ         | 62           | 21       | 94   | 21              | 312.53            |
| A0A222QFX8 | Nuclease SbcCD         | 43           | 30       | 43   | 4               | 124.39            |
| W8ZHA5     | Ribonuclease E         | 56           | 44       | 68   | 8               | 202.58            |
| W8T8L9     | Exodeoxyribonuclease 7 | 20           | 6        | 21   | 6               | 19.24             |
| A0A166VD00 | Exoribonuclease 2      | 17           | 6        | 6    | 6               | 13.05             |
| A0A073FMW3 | RecF                   | 36           | 8        | 8    | 8               | 11.18             |
| A0A017IAN7 | RecBCD                 | 14           | 6        | 7    | 6               | 13.63             |
| A0A062Y8Q3 | RecN                   | 15           | 4        | 4    | 4               | 6.93              |
| A0A222QVR5 | RdgC                   | 23           | 4        | 4    | 4               | 2.18              |
| A0A1E5WYB1 | RecQ                   | 8            | 3        | 3    | 3               | 1.74              |

**Table S2:** List of primers used in this study

| Gene       | Sequence                                                                                                                   | Name/RD sites | Vector (Base) |
|------------|----------------------------------------------------------------------------------------------------------------------------|---------------|---------------|
| $\beta$ C1 | F- ATATAGTCGACATGACTATCAAGTACAACAACAAGAAAGGC<br>R- TATATGAGCTCCTCGAGTCATACAGATACATTACTATACACT                              | AN34 and 35   | pBIN          |
| GFP-fusion | F- AATTACTGCAGGTCGACGGTACCATGAGTAAAGGAGAAGAAGT<br>TTTCACTGGA<br>R- ATAATGGATCCACCAGAACCACCTTTGTATAGTTCATCCATGCC<br>ATGTGTA | AN30 and 31   | pBIN          |
| $\beta$ C1 | F- CCATCCTCCAAAGGTACCTCTGGAAGTTCTGTTCCAGGGGCC<br>ATGGGA<br>R- CAGATCGTCAGTCAGTCACGATGCGGCCGCTCGAGTCATACA<br>GATACAT        | AN3 and 4     | pMAL-p5E      |
| NtRecA1    | F- ATTAAGGATCCGTCGACATGGATTTAAGCTTCCCAGTGAAAGC<br>TCAGC<br>R- ATAATCTCGAGTTATTGCATCTCTTGAAGTGCATCTTCCTC                    | BamHI /XhoI   | pBIN          |
| NtRecA3    | F- ATTATGGATCCGTCGACATGGCGAGGCTTCTTCGTAAGTGC<br>R- ATAATGAGCTCTCATGCCTCAACTGCAGTTGCAGCATCTTCAT<br>CAG                      | BamHI /SacI   | pBIN          |
| NtRad51D   | F- ATTAGGATCCTAATGCCGCTATTCAGCTCAATGGAGTGTG<br>R- TAATGCGGCCGCTCGAGTCATTGTACCTCGAACTCAACTCTA<br>TCTCC                      | BamHI / XhoI  | AD            |
| NtRad51D   | F- ATTAGGATCCATGCCGCTATTCAGCTCAATGGAGTGTG<br>R- TAATGCGGCCGCTCGAGTCATTGTACCTCGAACTCAACTCTA<br>TCTCC                        | BamHI /NotI   | BD            |
| NtRecA1    | F- ATTAGGATCCTAATGGATTTAAGCTTCCCAGTGAAAGCTCAGC                                                                             | BamHI /XhoI   | AD            |

|                             |                                                                                                                     |                |                |
|-----------------------------|---------------------------------------------------------------------------------------------------------------------|----------------|----------------|
|                             | R-<br>TAATGCGGCCGCCTCGAGTTATTGCATCTCTTGAAGTGCATCT<br>TCCTC                                                          |                |                |
| <b>NtRecA1</b>              | F- ATTAGGATCCATGGATTTAAGCTTCCCAGTGAAAGCTCAGC<br>R-<br>TAATGCGGCCGCCTCGAGTTATTGCATCTCTTGAAGTGCATCT<br>TCCTC          | BamHI<br>/NotI | BD             |
| <b>NtRecA3</b>              | F- ATTAGGATCCTAATGGCGAGGCTTCTTCGTA CTGCTAC<br>R-<br>TAATGCGGCCGCAGCTCTCATGCCTCAACTGCAGTTGCAGC<br>ATC                | BamHI<br>/SacI | AD             |
| <b>NtRecA3</b>              | F-<br>ATTAGGATCCATGGCGAGGCTTCTTCGTA CTGCTAC<br>R-<br>TAATGCGGCCGCAGCTCTCATGCCTCAACTGCAGTTGCAGC<br>ATC               | BamHI<br>/NotI | BD             |
| <b>EcRecA</b>               | F-<br>ATTAGGATCCTAATGGCTATCGACGAAAACAAACAGAAAGCG<br>R-<br>TAATGCGGCCGCCTCGAGTTAAAATCTTCGTTAGTTTCTGCTA<br>CGCC       | BamHI<br>/XhoI | AD             |
| <b>EcRecA</b>               | F-<br>ATTAGGATCCATGGCTATCGACGAAAACAAACAGAAAGCGTTG<br>G<br>R-<br>TAATGCGGCCGCCTCGAGTTAAAATCTTCGTTAGTTTCTGCTA<br>CGCC | BamHI<br>/NotI | BD             |
| <b>Antisense-<br/>RecA1</b> | F- ATTATATCGATACGCCTTCATGTCTTCGATCCTCC<br>R- ATAATGTCGACTTGAGAATGGCCTGGAATTCCGG                                     | Clal/S<br>all  | PVX            |
| <b>NtRecA1</b>              | F- ATTATATCGATATGGATTTAAGCTTCCCAGTGAAA<br>R- ATAATGTCGACTTATTGCATCTCTTGAAGTGCATC                                    | Clal/S<br>all  | PVX            |
| <b>Geno-<br/>NtActin</b>    | F- CGGACAGCCAGGTTTTGAGATAGC<br>R- AGGGAGCTTTAGGAAGAGGTCGTAGG                                                        |                | qPCR           |
| <b>NtRecA3</b>              | F-<br>ATATACCATGGGCATGGCGAGGCTTCTTCGTA CTGCTACTTC<br>R-<br>TAATGCGGCCGCAGCTCTCATGCCTCAACTGCAGTTGCAGC<br>ATC         | NcoI/X<br>hoI  | pRSF-<br>Duet1 |
| <b>NtRecA1</b>              | F-<br>ATATACCATGGGCATGGATTTAAGCTTCCCAGTGAAAGCTCAG<br>R-<br>TAATGCGGCCGCCTCGAGTTATTGCATCTCTTGAAGTGCATCT<br>TCCTC     | NcoI/S<br>acI  | pRSF-<br>Duet1 |
| <b>NtPP2A</b>               | F- GTGAAGCTGTAGGGCCTGAGC<br>R- CATAGGCAGGCACCAAATCC                                                                 |                | qPCR           |
| <b>NtDPD1</b>               | F- GGACCTCATTCCCATCTTATTGCG<br>R- CTCCGGACTTCATGACTTCACGTG                                                          |                | qPCR           |
| <b>SyYVCV-<br/>Rep</b>      | F- GTGAAAACGTTGTCAGTGCCGCTGCG<br>R- TGCTTTGCCAGTCTCTTTGGGCCCC                                                       |                | qPCR           |
| <b>Ntycf3</b>               | F- CCTTAGAACCGTACTTGAGAATTTCTTA<br>R- GGCTTTCTACATATGCATCGTC                                                        |                | qPCR           |
| <b>rpoB+psbm<br/>R</b>      | F- CAGGTATTGTAGATATTCCCTC<br>R- AAACAGTCAGTCAAACGATTAA                                                              |                | PCR/pro<br>be  |
| <b>SyYVCV_CR<br/>2_C</b>    | TATAGGCCACAAACCATTAATTAAGCTTTGAGGAGCGTC                                                                             |                | probe          |
| <b>SyYVCV_CR<br/>2</b>      | GACGCTCCTCAAAGCTTAATTAATGGTTTGTGGGCCTATA                                                                            |                | Probe          |

|                          |                                           |  |       |
|--------------------------|-------------------------------------------|--|-------|
| <b>SyYVCV_CR<br/>1_C</b> | CAATAATGCCATTTGGTACTCACCTATATATTGAGTACCA  |  | Probe |
| <b>SyYVCV_CR<br/>1</b>   | TGGTACTCAATATATAGGTGAGTACCAAATGGCATTATTG  |  | Probe |
| <b>SyYVCV_C1</b>         | GCGGAATTCCCCTACTATCTTCTCTGCAATCCAGGACCCAA |  | Probe |
| <b>SyYVCV_C1</b>         | TTGGGTCTGGATTGCAGAGGAAGATAGTGGGAATTCCGC   |  | Probe |
| <b>SyYVCV_AV<br/>1_C</b> | ACTTCCCAGCCTCTTGCTGGTTATACACAACATAATTATT  |  | Probe |
| <b>SyYVCV_AV<br/>1</b>   | AATAATTATGTTGTGTATAACCAGCAAGAGGCTGGGAAGT  |  | Probe |

**Table S3:** List of clones used in this study

| S.No | Gene name/ Tag details | Plasmid name | Vector (Base) |
|------|------------------------|--------------|---------------|
| 1    | MBP-βC1                | pAN9         | pMAL-p5E      |
| 2    | βC1-HIS                | pAN17        | pBIN19        |
| 3    | βC1-GFP                | pAN24        | pBIN19        |
| 4    | mβC1-GFP               | pAN26        | pBIN19        |
| 5    | GFP-βC1                | pAN28        | pBIN19        |
| 6    | MBP-βC1_T8             | pAN31        | pMAL-p5E      |
| 7    | MBP-βC1_m1             | pAN32        | pMAL-p5E      |
| 8    | MBP-βC1_m2             | pAN33        | pMAL-p5E      |
| 9    | MBP-βC1_m3             | pAN34        | pMAL-p5E      |
| 10   | MBP-βC1_m4             | pAN35        | pMAL-p5E      |
| 11   | MBP-βC1_m5             | pAN36        | pMAL-p5E      |
| 12   | MBP-βC1_m6             | pAN37        | pMAL-p5E      |
| 13   | MBP-βC1_m7             | pAN38        | pMAL-p5E      |
| 14   | MBP-βC1_m8             | pAN39        | pMAL-p5E      |
| 15   | MBP-βC1_m9             | pAN40        | pMAL-p5E      |
| 16   | MBP-βC1_m10            | pAN41        | pMAL-p5E      |
| 17   | MBP-βC1_T1             | pAN48        | pMAL-p5E      |
| 18   | MBP-βC1_T5             | pAN49        | pMAL-p5E      |
| 19   | MBP-βC1_T7             | pAN50        | pMAL-p5E      |
| 20   | MBP-βC1_T6             | pAN51        | pMAL-p5E      |
| 21   | MBP-βC1_T3             | pAN54        | pMAL-p5E      |
| 22   | MBP-βC1_T2             | pAN55        | pMAL-p5E      |
| 23   | MBP-βC1_T4             | pAN56        | pMAL-p5E      |
| 24   | MBP mSIM2,3,4 βC1      | pAN78        | pMAL-p5E      |
| 25   | AD-HA RecA             | pAN79        | pGAD-T7       |
| 26   | AD-HA RecA1            | pAN80        | pGAD-T7       |
| 27   | AD-HA RecA3            | pAN81        | pGAD-T7       |
| 28   | BD-MYC Rad51D          | pAN82        | pGBK-T7       |
| 29   | BD-MYC RecA            | pAN83        | pGBK-T7       |
| 30   | BD-MYC RecA1           | pAN84        | pGBK-T7       |
| 31   | BD-MYC RecA3           | pAN85        | pGBK-T7       |
| 32   | DNA-A partial dimer    | pSD-30       | pBIN19        |
| 33   | DNA-β partial dimer    | AN-Beta&     | pBIN19        |

**Table S4:** List of Sequence Id's used to construct clones

| GENE                        | NCBI           |
|-----------------------------|----------------|
| <b>SyYVCV DNA-A</b>         | NC_038994      |
| <b>SyYVCV DNA-β</b>         | KX363444.1     |
| <b>SyYVCV βC1</b>           | KX363444.1     |
| <b>Caulobacter. Sp RecA</b> | NC_002696.2    |
| <b>NtRecA1</b>              | XM_016642733.1 |

|                            |                |
|----------------------------|----------------|
| <b><i>NtRecA3</i></b>      | XM_016629478.1 |
| <b><i>NtRad51D</i></b>     | XM_016630781.1 |
| <b><i>E. coli RecA</i></b> | NC_000913.3    |
| <b><i>NtDPD1</i></b>       | XM_016587962.1 |

**Table S5:** List of antibodies and IP materials used in this study

| <b>Reagent Type</b> | <b>Material</b>        | <b>Catalogue No.</b> |
|---------------------|------------------------|----------------------|
| Antibody            | Anti-GFP               | Abcam (ab290)        |
| Antibody            | Anti-MBP               | Abcam (ab9084)       |
| Antibody            | Anti-His               | CST (2366)           |
| Antibody            | Anti-MYC               | Abcam (ab9106)       |
| Antibody            | Anti-HA                | CST (3724)           |
| IP                  | GFP-Trap               | Chromotek            |
| IP                  | Anti-MBP-Magnetic      | NEB (E8037S)         |
| Beads               | MBP(Dextrin Sepharose) | GE (28935597)        |
| Beads               | Ni NTA (Agarose)       | Qiagen 30210         |
